# Supplementary material for: An interaction study of online learning satisfaction with parent-child relationships and trait coping styles
Source: Front Psychiatry. 2024 Mar 1;15:1320886. doi: 10.3389/fpsyt.2024.1320886 (PMC10940432; doi:10.3389/fpsyt.2024.1320886)
Supplement: Supplementary file 2 [file DataSheet_2.xlsx]

## Sheet: Sheet1
number（ID）	time	education level	grade(1-12)	gender	health status	residence	risk level	Parent-child relationships	learning state	Satisfaction with online learning	Q1	Q2	Q3	Q4	Q5	Q6	Q7	Q8	Q9	Q10	Q11	Q12	Q13	Q14	Q15	Q16	Q17	Q18	Q19	Q20
1	247	high school	6	2	2	2	1	1	1	1	1	1	1	1	2	2	2	2	2	2	2	2	2	2	2	2	2	2	2	2
2	268	high school	4	1	1	2	1	4	3	3	5	1	2	1	5	3	2	3	5	2	4	2	1	5	5	3	4	3	3	5
3	494	high school	4	2	2	2	1	3	4	3	5	2	2	2	5	3	4	3	2	4	4	3	3	3	4	2	2	2	2	2
4	558	high school	6	1	3	2	3	4	2	3	4	3	2	4	3	4	3	2	4	3	3	3	2	3	5	4	4	2	5	5
5	401	high school	4	2	3	2	3	2	2	3	1	4	2	4	3	4	4	4	4	3	4	4	4	3	3	3	3	3	4	4
6	330	high school	4	1	3	4	1	3	5	5	4	4	3	3	3	4	4	2	4	3	3	4	4	4	4	4	4	3	3	3
7	769	high school	4	2	2	2	1	3	4	4	4	4	1	1	4	5	4	3	4	2	4	3	3	4	5	4	4	3	3	4
8	668	high school	6	1	2	4	1	4	3	3	4	3	4	1	4	3	3	3	4	5	5	3	3	3	4	3	4	3	4	4
9	320	high school	4	2	3	2	1	3	3	3	3	3	3	4	4	4	4	4	4	4	4	4	4	4	4	4	4	4	4	4
10	852	high school	4	2	1	2	1	3	3	3	4	2	3	1	4	2	4	2	3	1	2	1	2	5	5	2	2	1	1	4
11	466	high school	4	1	1	2	3	5	5	5	4	2	2	4	4	3	4	2	4	4	2	3	4	1	1	2	1	5	2	4
12	1008	high school	4	2	2	2	3	3	4	4	3	4	3	2	3	3	5	3	3	3	4	2	3	4	4	4	3	3	4	4
13	337	high school	4	1	3	2	1	3	3	3	2	4	2	3	2	4	4	3	3	5	4	4	3	3	3	4	4	3	4	3
14	349	high school	4	2	3	2	1	3	2	2	4	3	3	4	4	4	3	4	2	2	4	2	3	4	4	4	4	4	4	4
15	399	high school	4	2	3	2	2	3	3	3	4	5	4	3	4	4	4	4	4	2	3	2	2	4	4	4	4	2	3	3
16	375	high school	4	1	4	2	1	3	3	3	5	1	2	4	4	4	2	4	4	5	5	1	4	4	3	2	1	4	4	5
17	373	midel school	2	1	3	2	1	3	3	3	3	4	2	3	2	4	4	4	4	5	4	3	3	3	5	5	5	4	5	4
18	368	midel school	2	1	2	4	1	3	2	2	3	3	3	3	3	3	3	3	3	3	3	3	3	3	3	3	3	4	2	3
19	506	midel school	2	1	2	2	3	4	1	1	4	4	1	2	4	5	3	4	4	5	5	4	4	3	4	4	4	3	2	3
20	451	midel school	2	1	2	3	1	3	2	3	4	4	2	4	2	4	3	2	3	3	2	2	4	2	1	3	2	3	2	3
21	1228	midel school	2	2	2	3	1	3	3	3	4	3	3	3	4	3	3	4	4	4	4	2	4	3	4	3	4	4	3	4
22	543	midel school	3	2	2	5	1	3	3	3	4	3	2	4	3	4	4	4	2	1	2	4	3	4	4	2	4	4	1	4
23	570	midel school	3	1	3	5	3	3	3	3	4	1	4	2	4	4	4	4	2	4	2	4	4	4	4	2	4	2	4	2
24	331	midel school	1	1	3	5	1	3	3	3	3	3	3	3	3	3	3	3	3	3	3	3	3	3	3	3	3	3	3	3
25	408	midel school	1	1	2	5	1	3	4	4	4	4	4	2	4	4	4	4	4	4	4	4	4	4	4	4	4	4	4	4
26	418	midel school	1	1	1	4	1	3	4	4	4	1	4	4	4	4	4	4	4	4	4	3	1	5	5	2	2	4	4	4
27	669	midel school	3	1	2	5	1	5	3	3	3	3	3	3	4	3	3	3	4	3	4	2	2	3	3	3	1	4	1	3
28	683	midel school	2	1	2	5	1	3	2	3	4	4	3	3	4	3	3	4	4	4	5	3	4	4	5	4	4	4	4	3
29	799	midel school	3	1	3	5	1	3	3	3	4	3	3	3	3	3	2	2	3	1	2	2	2	2	3	3	1	1	1	3
30	561	midel school	2	2	2	5	1	3	5	4	5	1	1	1	5	1	1	1	5	1	5	1	1	5	5	1	2	1	2	4
31	1067	midel school	1	1	1	5	1	5	5	5	3	3	1	1	5	2	1	1	4	3	4	1	1	3	3	4	3	1	1	1
32	554	midel school	1	1	2	5	1	4	4	4	5	2	2	2	4	5	2	2	4	4	4	3	4	4	2	2	4	4	2	3
33	526	midel school	1	2	2	5	1	4	3	3	2	4	2	2	4	3	3	3	3	2	4	3	4	3	3	3	3	3	3	3
34	589	midel school	1	2	1	5	1	3	3	3	4	4	3	4	4	4	4	3	4	4	3	2	3	5	5	4	4	5	2	3
35	860	midel school	2	1	1	5	2	2	3	3	3	2	4	3	2	4	5	5	2	4	5	1	1	5	1	5	5	1	1	5
36	1206	midel school	1	2	3	5	3	3	3	4	3	3	3	4	3	3	3	3	3	3	3	3	3	3	3	3	3	5	3	3
37	423	midel school	3	2	5	5	1	3	3	3	4	2	4	2	2	3	3	2	2	3	3	3	3	3	3	3	3	3	3	3
38	580	midel school	3	2	3	5	1	3	3	3	5	1	3	2	5	3	4	2	4	1	3	1	1	4	4	1	3	2	4	4
39	1289	midel school	2	2	2	5	1	5	4	4	5	3	5	1	5	5	4	4	4	5	4	2	4	5	5	4	1	1	4	5
40	1191	midel school	1	1	3	5	1	4	2	2	4	2	3	4	5	4	4	4	5	4	4	3	5	5	5	5	3	2	4	4
41	815	midel school	1	1	2	4	1	3	3	4	2	3	3	3	3	3	3	3	3	3	3	3	3	3	3	3	3	3	3	3
42	989	midel school	1	2	1	5	1	3	4	4	5	1	4	1	5	2	1	4	5	1	5	1	4	4	5	2	1	5	4	5
43	692	midel school	3	2	2	5	1	3	1	1	4	4	4	4	4	4	4	4	4	4	4	4	4	4	4	4	4	4	4	4
44	423	midel school	3	2	3	5	1	3	3	3	4	4	2	3	4	4	3	4	4	3	4	4	3	4	4	4	2	3	2	4
45	684	midel school	2	1	3	5	1	3	3	5	3	3	3	3	3	3	3	3	4	3	3	3	3	3	3	3	3	1	3	3
46	487	midel school	3	1	2	5	2	3	3	3	4	4	2	1	4	5	3	3	4	4	4	1	2	3	4	3	2	1	4	4
47	491	midel school	3	1	2	5	1	3	4	3	3	3	2	5	3	5	5	3	3	3	3	2	3	3	4	4	4	3	4	3
48	572	midel school	3	1	2	5	1	3	3	3	2	2	2	3	3	3	3	3	3	4	3	3	3	3	4	4	4	3	4	3
49	616	midel school	2	1	2	5	1	3	4	4	4	1	3	2	4	4	2	2	4	4	4	1	3	4	4	1	2	2	2	4
50	527	midel school	3	1	4	5	1	3	4	5	3	3	1	1	2	4	4	4	4	4	4	4	4	4	4	4	4	4	4	4
51	694	midel school	2	1	2	5	1	4	4	4	4	1	1	1	5	4	1	5	5	2	5	1	1	1	4	1	1	1	1	5
52	1138	midel school	1	2	2	5	1	5	4	4	5	1	2	1	5	2	1	1	5	1	5	1	1	4	5	1	1	5	1	4
53	698	midel school	3	1	2	5	1	3	3	3	4	1	2	1	4	4	4	3	3	1	5	4	3	3	4	1	4	4	2	4
54	732	midel school	3	1	3	5	2	4	3	3	2	2	3	4	4	4	4	2	4	5	4	4	4	4	4	4	4	2	4	4
55	731	midel school	3	2	1	5	1	3	2	1	5	2	5	1	3	4	5	4	1	2	1	2	3	5	1	5	5	5	5	1
56	1335	midel school	1	1	2	5	1	3	3	3	3	3	3	3	3	3	3	3	3	3	3	3	3	3	3	3	3	3	3	3
57	633	midel school	3	2	2	5	1	3	4	4	4	3	3	2	4	4	4	3	4	2	3	3	3	3	4	3	3	3	3	4
58	569	midel school	3	1	2	5	1	4	3	3	5	1	3	1	5	4	4	3	4	2	2	3	2	4	4	4	3	2	3	4
59	700	midel school	1	2	3	5	1	2	3	3	5	5	3	5	4	4	3	4	3	3	3	3	3	4	4	4	4	3	4	4
60	756	midel school	1	1	2	5	1	3	4	3	4	1	3	1	5	3	1	1	4	2	4	1	1	3	5	1	1	1	1	3
61	848	midel school	3	1	3	5	1	3	4	4	3	3	4	4	4	4	4	3	4	2	4	2	4	2	5	2	3	4	1	1
62	985	midel school	3	2	3	5	1	4	4	5	5	1	1	1	5	1	1	1	3	1	5	1	1	5	4	1	3	1	1	3
63	385	midel school	2	1	2	5	1	3	5	5	4	3	3	3	4	4	4	4	4	2	4	2	4	4	4	4	4	2	4	3
64	581	midel school	1	1	2	5	1	4	3	3	4	1	2	2	5	4	2	4	4	4	5	1	4	4	5	2	2	2	4	2
65	516	midel school	1	2	2	5	1	4	4	3	5	4	3	4	5	3	3	4	5	4	5	4	4	5	5	4	4	4	3	3
66	752	midel school	1	2	2	5	1	3	3	3	4	1	2	2	4	3	2	4	4	1	4	1	4	4	5	4	3	3	1	4
67	403	midel school	1	2	1	5	1	4	3	5	4	2	2	2	4	4	2	2	4	2	4	2	4	4	4	2	4	2	4	4
68	321	midel school	3	1	3	5	1	3	3	3	3	3	3	3	3	3	3	3	3	3	3	3	3	3	3	3	3	3	3	3
69	1026	midel school	3	1	3	5	1	3	3	4	2	4	1	3	1	5	5	1	3	1	3	4	2	4	4	5	5	3	2	5
70	453	midel school	3	2	3	5	1	3	3	3	3	1	3	3	4	4	4	3	3	2	2	3	2	3	5	3	1	3	3	4
71	641	midel school	3	2	2	5	2	3	4	4	5	4	2	3	3	3	3	3	3	3	3	3	3	3	3	3	3	3	3	3
72	1006	midel school	1	2	1	5	1	4	3	3	5	1	2	1	2	1	1	1	4	1	4	1	2	4	4	2	2	2	1	4
73	2328	midel school	3	2	1	5	1	4	4	4	5	1	4	1	5	4	4	4	5	4	5	1	4	4	5	4	1	1	2	5
74	416	midel school	3	2	2	5	1	4	3	3	4	4	3	4	2	5	4	3	2	2	5	5	4	4	5	5	4	5	5	5
75	521	midel school	3	2	3	4	2	3	3	5	3	3	3	3	3	4	3	3	2	3	4	1	4	3	5	4	4	3	2	3
76	603	midel school	3	1	1	5	1	4	2	2	4	4	2	1	4	4	3	4	5	3	5	4	2	5	4	2	2	1	3	3
77	1175	midel school	1	2	3	5	1	4	4	3	2	1	2	1	1	1	1	1	4	1	4	2	2	2	4	2	1	1	1	2
78	895	midel school	2	1	1	4	2	5	4	4	4	4	2	2	4	4	4	4	4	4	4	5	2	4	2	5	2	2	4	5
79	487	midel school	3	1	1	5	1	3	4	4	4	2	2	4	4	4	4	3	4	4	4	2	4	2	3	2	2	5	4	4
80	599	midel school	1	1	1	5	3	4	4	5	5	1	5	1	5	1	5	5	4	1	1	1	1	5	5	1	1	1	1	5
81	675	midel school	3	1	3	5	1	3	3	4	5	2	5	3	4	5	4	4	3	4	2	3	3	4	5	2	4	2	4	2
82	904	midel school	2	1	3	5	1	3	3	4	4	2	4	1	2	1	2	1	4	2	4	1	1	4	4	2	1	4	2	3
83	1317	midel school	1	2	2	5	3	3	4	4	4	1	5	2	4	2	1	5	5	2	4	1	2	4	5	2	1	5	2	4
84	755	midel school	1	2	5	5	1	3	5	5	5	3	3	2	5	4	2	2	5	3	3	2	3	4	4	4	4	5	3	5
85	545	midel school	2	2	2	5	1	4	2	3	3	4	1	2	3	2	1	3	4	1	4	1	2	4	5	2	3	4	2	5
86	593	midel school	3	1	3	4	1	4	3	3	4	4	3	2	4	5	3	1	3	2	3	3	3	2	4	2	2	3	3	4
87	635	midel school	3	1	2	5	1	4	3	3	3	3	2	1	4	4	3	1	3	3	3	1	2	3	2	2	3	1	4	1
88	930	midel school	3	1	2	5	3	5	3	5	5	3	3	1	4	1	3	3	3	2	4	2	4	3	4	4	3	4	4	4
89	1130	midel school	2	1	3	5	1	4	3	4	4	1	2	1	5	3	2	4	4	2	3	1	2	3	4	3	1	1	1	5
90	794	midel school	2	2	2	5	2	4	4	3	4	3	3	4	4	4	2	4	4	4	3	3	3	3	4	3	2	3	2	3
91	885	midel school	2	1	3	4	1	4	3	3	3	3	3	3	3	4	4	3	3	3	3	2	3	4	4	3	3	4	3	3
92	675	midel school	1	1	3	5	1	4	3	3	3	2	2	1	4	3	3	1	3	4	3	1	2	4	3	3	2	3	2	4
93	555	midel school	3	2	2	5	1	3	3	3	3	2	4	2	2	4	2	3	2	3	3	2	3	2	4	2	3	3	3	4
94	972	midel school	3	1	3	5	1	3	3	3	5	3	4	1	4	3	1	1	3	1	5	3	3	3	5	3	1	3	4	4
95	2379	midel school	1	1	1	5	3	4	4	3	4	2	1	2	3	3	4	1	3	3	5	1	2	5	5	4	2	1	5	5
96	730	midel school	3	2	2	5	3	4	3	3	4	2	5	2	4	3	3	1	3	2	3	1	3	4	5	3	1	1	1	4
97	415	midel school	3	2	1	5	2	4	3	4	3	3	4	4	3	5	5	3	3	4	3	3	3	2	4	5	5	5	5	3
98	579	midel school	3	1	3	5	3	3	2	2	4	4	4	4	4	4	4	2	4	2	4	2	2	4	4	2	3	2	3	4
99	754	midel school	1	2	3	5	1	4	3	4	4	2	3	2	5	4	1	3	4	2	5	1	3	3	5	2	2	5	3	4
100	975	midel school	1	1	1	5	1	3	4	4	5	3	4	1	5	3	4	4	4	3	5	1	4	4	4	4	4	3	4	4
101	848	midel school	1	1	2	5	1	3	3	3	3	3	3	3	3	4	4	3	4	3	2	3	3	3	4	4	3	2	3	4
102	718	midel school	3	1	2	5	1	3	3	5	5	4	3	3	4	3	3	3	3	1	4	3	4	4	3	1	5	4	2	4
103	642	midel school	1	2	2	5	1	4	3	3	5	1	3	2	4	2	1	3	4	4	4	3	4	4	3	4	3	3	3	3
104	571	midel school	1	1	2	5	1	4	3	4	4	4	3	3	3	3	3	3	3	4	4	3	3	3	4	3	3	3	3	4
105	388	midel school	3	2	2	5	1	3	4	4	5	3	3	3	3	3	3	1	3	3	3	3	3	3	3	3	4	2	4	3
106	443	midel school	2	1	3	5	1	4	2	2	2	4	1	4	2	5	5	1	2	4	5	2	2	1	5	5	5	1	5	5
107	388	midel school	2	1	3	5	3	3	3	4	1	5	2	4	4	4	5	4	5	5	4	4	3	4	3	4	5	1	5	5
108	463	midel school	1	2	4	5	1	4	4	4	3	2	3	1	4	4	4	3	3	3	4	3	3	3	4	3	4	3	1	3
109	747	midel school	3	2	3	5	1	3	3	4	4	3	1	3	5	5	4	3	5	2	4	1	1	3	4	4	1	5	5	4
110	454	midel school	2	1	1	5	3	4	3	3	5	1	1	4	4	4	2	4	4	5	4	4	5	4	2	4	1	4	2	1
111	475	midel school	2	1	1	5	1	3	3	3	5	5	3	3	5	3	3	3	3	3	3	3	3	3	2	2	3	3	5	5
112	698	midel school	3	2	3	4	1	3	3	3	3	3	3	3	2	2	3	4	3	3	2	2	4	3	3	2	3	3	3	2
113	673	midel school	3	1	4	5	1	3	4	4	2	4	4	2	4	4	4	2	3	4	4	2	4	4	4	4	2	2	4	4
114	753	midel school	3	1	1	5	1	3	4	4	3	2	3	4	2	5	3	1	2	4	3	1	4	4	5	4	1	2	5	2
115	605	midel school	3	1	3	5	1	3	3	3	3	3	5	1	5	3	3	3	5	3	3	3	3	3	3	3	3	3	3	4
116	455	midel school	1	1	2	5	1	3	3	3	1	4	4	1	4	1	1	4	1	1	1	5	1	5	1	1	5	1	5	5
117	605	midel school	2	1	3	5	1	3	2	3	2	3	3	4	3	4	4	4	3	4	4	3	3	3	3	3	3	2	3	4
118	911	midel school	1	1	1	6	3	5	3	5	4	1	5	2	3	4	5	1	3	3	4	1	3	3	3	1	1	1	1	1
119	820	midel school	2	1	2	5	1	3	4	4	4	4	2	1	4	4	4	2	4	4	4	2	2	4	4	2	2	2	2	4
120	908	midel school	1	1	1	4	1	4	3	3	3	3	3	1	4	3	2	3	4	3	4	2	3	3	4	2	2	2	4	4
121	863	midel school	3	1	2	5	2	3	3	5	5	1	3	1	5	1	1	1	5	1	4	3	1	5	5	1	1	3	1	5
122	425	midel school	3	2	3	5	1	5	5	5	2	3	3	3	3	3	3	3	3	3	3	1	3	3	3	5	5	5	3	5
123	425	midel school	3	2	3	5	3	2	3	3	4	4	5	2	5	5	4	3	3	3	4	2	3	4	4	2	3	2	3	4
124	512	midel school	1	2	2	5	1	5	3	4	5	1	1	1	5	1	1	2	1	1	5	1	2	5	5	5	2	2	1	5
125	424	midel school	3	1	3	5	1	3	2	2	5	4	4	3	4	4	4	3	1	5	2	4	3	4	3	4	4	3	4	4
126	788	midel school	3	1	2	5	1	3	3	3	4	2	2	2	5	4	2	2	2	1	5	2	2	3	2	2	2	2	2	5
127	439	midel school	1	2	5	5	1	3	5	3	5	5	5	1	5	1	5	5	4	4	5	1	3	5	5	5	5	2	5	5
128	250	midel school	3	2	3	5	1	4	3	4	4	4	4	4	4	4	4	4	4	4	4	4	4	4	4	4	4	4	4	4
129	1012	midel school	1	1	2	5	1	3	3	3	4	2	1	1	3	3	2	2	2	2	3	1	3	2	3	4	2	1	1	2
130	900	midel school	1	1	2	5	1	2	3	5	3	5	3	4	3	5	5	3	1	5	3	4	4	4	3	5	5	2	5	5
131	691	midel school	2	2	2	5	1	4	5	5	1	5	3	5	5	5	1	5	1	1	5	1	1	5	5	1	5	1	1	5
132	800	midel school	2	2	2	5	1	3	2	3	4	3	3	1	4	1	5	3	4	1	2	1	2	4	5	3	2	4	4	4
133	391	midel school	1	1	2	5	2	4	4	4	4	2	2	2	4	4	3	3	3	2	3	3	3	3	3	3	3	3	2	4
134	161	midel school	3	2	1	5	1	5	5	5	3	3	3	3	3	3	3	3	3	3	3	3	3	3	3	3	3	3	5	5
135	572	midel school	3	2	3	5	2	4	4	4	3	1	3	3	5	5	1	3	5	1	4	1	1	4	5	3	3	3	3	5
136	603	midel school	3	1	3	5	1	3	4	3	3	3	3	3	4	3	2	3	3	3	4	2	2	3	4	3	3	3	4	3
137	579	midel school	3	2	3	5	1	3	3	4	4	2	2	2	2	3	4	2	3	2	3	4	2	2	3	3	3	2	2	3
138	582	midel school	3	2	1	5	1	4	4	4	5	1	5	2	5	1	1	1	5	1	5	1	3	5	5	1	1	4	1	5
139	686	midel school	3	1	2	5	1	4	4	4	3	4	2	4	3	5	4	3	3	3	4	2	2	2	5	5	5	2	5	2
140	637	midel school	3	2	1	5	1	5	4	4	1	1	3	1	5	1	1	1	1	1	1	1	1	5	5	1	2	1	1	1
141	498	midel school	3	2	3	5	3	3	3	3	5	1	3	1	5	5	1	3	5	1	3	1	1	5	5	1	1	1	5	5
142	706	midel school	3	2	2	4	1	4	4	5	5	1	5	1	5	1	1	1	4	1	5	1	1	5	1	1	1	3	1	4
143	267	midel school	3	1	3	5	1	3	5	5	4	4	3	3	2	4	5	3	1	4	4	5	5	3	1	1	4	4	5	3
144	638	midel school	1	2	3	5	1	3	5	5	4	2	2	2	5	2	2	2	2	2	2	2	2	3	3	2	2	2	2	3
145	771	midel school	1	1	1	5	1	4	5	5	4	4	3	3	4	3	3	3	3	3	4	2	3	4	4	3	3	1	3	3
146	499	midel school	1	2	3	5	1	3	3	3	4	1	3	2	5	2	2	3	4	1	4	3	2	4	4	4	3	1	2	4
147	405	midel school	2	2	2	4	1	4	3	3	4	2	3	3	5	5	4	4	3	1	4	3	2	4	3	3	3	4	4	3
148	547	midel school	2	1	3	5	1	3	3	3	3	2	2	2	3	2	4	4	4	4	3	4	3	3	4	4	3	3	3	3
149	1099	midel school	2	1	4	5	2	4	2	2	4	4	3	3	5	4	4	4	4	4	4	4	4	4	2	3	2	3	4	4
150	189	midel school	3	1	3	5	1	3	3	3	3	3	3	3	3	3	3	3	3	3	3	3	3	3	3	3	3	3	3	3
151	944	midel school	2	1	3	6	1	3	3	4	1	5	4	5	5	5	5	4	3	5	5	1	1	1	3	5	5	5	5	5
152	1265	midel school	3	2	2	5	1	2	3	3	2	4	2	4	4	4	5	4	2	4	5	3	4	3	3	4	4	2	4	4
153	525	midel school	2	2	3	5	1	5	4	4	3	3	3	3	3	3	3	3	3	4	4	4	1	5	1	1	3	3	1	2
154	768	midel school	2	1	4	5	1	3	1	3	1	5	1	4	1	5	5	5	1	4	2	4	5	1	2	5	5	1	5	5
155	541	midel school	2	1	4	5	1	3	3	3	2	2	3	3	5	2	4	4	4	4	3	4	2	3	4	3	4	4	4	4
156	489	midel school	1	1	2	5	1	3	4	4	3	3	2	2	4	4	4	3	4	3	3	3	2	3	4	3	4	3	4	3
157	1225	midel school	2	1	2	5	1	4	3	3	4	4	4	3	4	4	4	3	4	4	5	1	3	3	4	1	2	2	2	4
158	1160	midel school	3	2	3	5	1	4	3	3	3	1	2	1	4	3	2	2	4	1	3	1	2	4	4	2	2	1	2	3
159	588	midel school	3	2	2	5	1	3	3	3	3	3	3	3	3	3	3	3	3	3	3	3	3	3	3	3	3	3	3	3
160	396	midel school	3	2	3	5	1	3	3	2	2	4	3	4	3	4	3	4	3	4	3	2	3	2	3	3	2	3	4	3
161	628	midel school	3	1	3	5	3	3	5	5	4	3	4	2	5	5	5	2	5	5	5	2	5	5	5	5	1	4	5	5
162	692	midel school	3	2	2	5	1	3	4	3	2	4	2	4	2	5	4	4	3	4	2	3	2	3	4	4	5	2	4	4
163	843	midel school	2	2	3	5	1	3	3	3	3	3	2	1	1	3	3	3	3	3	3	3	3	3	3	3	3	3	3	3
164	617	midel school	3	2	2	5	2	3	4	4	5	1	2	1	5	4	2	2	4	4	4	3	2	4	4	2	2	2	2	4
165	151	midel school	3	2	3	4	3	3	3	3	3	3	3	3	3	3	3	3	3	3	3	3	3	3	3	3	3	3	3	3
166	1159	midel school	3	2	4	5	1	4	2	4	3	4	4	2	2	4	5	2	3	4	4	2	4	3	3	4	3	2	4	4
167	539	midel school	2	2	2	5	1	4	4	3	4	2	3	2	4	4	4	4	4	3	4	2	3	4	3	4	2	4	3	3
168	520	midel school	1	2	3	4	1	2	3	2	4	2	2	4	4	4	3	3	3	3	3	3	3	3	4	3	4	3	3	3
169	321	midel school	2	2	3	6	1	4	3	3	3	4	3	4	3	3	5	4	3	4	4	3	3	3	3	3	3	3	3	3
170	276	midel school	2	2	3	4	3	3	4	4	2	3	1	2	3	2	1	5	1	3	2	1	1	3	4	3	2	3	1	3
171	804	midel school	3	1	3	5	1	3	3	3	5	4	4	3	5	2	1	2	3	1	5	4	4	4	3	3	3	3	3	4
172	454	midel school	3	2	1	5	1	3	3	4	4	3	3	3	4	4	4	4	4	4	4	4	4	4	4	4	4	4	4	4
173	526	midel school	3	2	2	5	1	3	3	3	3	3	3	3	3	3	3	3	3	3	3	3	3	3	3	3	3	3	3	3
174	484	midel school	3	1	2	4	1	4	5	5	3	3	1	2	5	3	2	2	5	4	4	3	3	2	5	2	4	2	4	5
175	721	midel school	3	1	3	5	2	3	2	3	4	2	3	2	4	2	2	2	4	4	4	2	3	3	4	2	2	3	2	4
176	384	midel school	3	1	3	5	3	3	3	3	3	3	3	3	3	3	3	3	3	3	3	3	3	3	4	3	3	4	3	3
177	480	midel school	2	2	3	5	1	3	3	3	3	3	3	3	3	3	3	3	3	3	3	3	3	3	3	3	3	3	3	3
178	1069	midel school	2	1	4	5	1	3	3	3	4	4	4	3	4	4	3	4	4	4	4	3	3	3	5	4	3	3	3	3
179	418	midel school	3	2	1	5	1	3	5	5	2	4	2	4	4	4	4	3	4	4	4	1	3	4	4	4	5	2	4	4
180	659	midel school	3	2	5	5	1	1	5	5	4	4	4	2	4	4	1	1	1	1	5	1	1	1	1	1	1	5	1	1
181	364	midel school	3	2	4	5	1	3	3	3	3	3	3	3	3	3	3	3	3	3	3	3	3	3	3	3	3	3	3	3
182	695	midel school	3	2	2	5	1	3	4	4	5	1	4	1	4	2	2	4	3	2	3	2	2	3	3	2	2	2	2	3
183	464	midel school	3	1	1	5	1	4	4	4	1	5	1	5	1	5	5	3	1	5	1	5	2	4	5	5	5	1	5	1
184	600	midel school	3	2	3	6	3	3	3	3	5	1	3	2	3	3	3	3	4	1	4	4	2	4	4	2	1	5	2	5
185	641	midel school	2	1	3	5	2	3	4	4	4	2	4	4	2	4	5	5	3	4	4	4	4	2	4	4	4	2	4	3
186	526	midel school	3	1	2	5	1	4	3	3	3	1	4	1	5	4	5	3	5	5	5	1	3	1	5	5	3	2	3	3
187	1195	midel school	2	2	2	5	1	5	4	4	4	2	2	1	4	4	2	4	4	2	4	2	3	4	5	2	2	2	2	4
188	555	midel school	3	1	1	4	1	3	4	4	3	3	2	3	5	4	3	1	3	5	4	1	3	5	5	4	3	1	5	4
189	486	midel school	3	1	2	5	1	4	4	4	4	1	2	4	5	4	2	2	5	4	4	1	2	5	2	2	2	1	2	5
190	1436	midel school	3	1	2	5	1	3	4	4	4	4	3	2	3	4	3	2	4	2	3	3	3	2	3	3	2	3	3	3
191	144	midel school	3	2	1	5	1	4	3	3	4	4	2	2	2	2	2	4	4	2	4	2	2	4	4	2	2	2	2	4
192	1378	midel school	3	1	3	5	1	4	3	3	4	4	3	4	3	4	3	1	4	4	4	2	3	2	1	3	5	3	3	3
193	627	midel school	2	1	2	5	1	2	4	4	1	4	4	2	5	4	4	4	4	4	1	2	4	4	2	4	5	2	5	5
194	441	midel school	3	1	3	5	3	3	3	3	4	4	5	1	5	4	2	1	5	1	1	1	1	4	4	3	1	5	5	3
195	627	midel school	2	1	3	5	1	3	3	3	3	2	2	1	4	2	3	2	2	3	2	1	4	3	4	1	1	3	1	4
196	829	midel school	1	1	3	5	1	3	3	4	3	3	2	3	5	4	3	3	4	4	3	3	3	3	5	3	3	2	3	2
197	856	midel school	3	1	2	5	3	3	3	3	3	2	2	3	4	3	3	3	3	3	3	2	2	3	3	2	2	3	2	2
198	582	midel school	3	1	3	5	1	2	4	4	3	3	3	3	3	3	3	3	3	3	4	3	3	3	3	3	3	3	3	4
199	573	midel school	3	1	3	5	1	1	4	4	3	4	5	1	3	1	5	1	1	5	1	2	5	5	5	3	5	5	5	4
200	1371	midel school	2	1	2	5	1	4	3	3	5	3	3	1	5	3	4	4	3	1	4	2	1	5	5	4	5	4	5	5
201	967	midel school	2	1	2	5	3	3	3	5	3	4	4	4	5	4	4	3	5	5	4	4	5	5	5	1	2	2	4	2
202	394	midel school	2	1	2	5	1	5	4	4	5	2	3	1	4	1	3	1	4	1	5	1	2	4	4	1	1	4	1	5
203	1317	midel school	1	1	3	5	1	3	3	3	2	4	3	4	3	3	4	3	3	4	2	5	3	3	5	5	4	3	5	3
204	652	midel school	3	1	2	5	1	3	3	4	4	3	3	3	4	4	4	3	3	4	4	3	3	4	4	3	3	3	3	4
205	531	midel school	3	1	2	5	1	3	4	4	4	3	3	1	5	4	4	3	4	4	3	3	3	2	3	4	4	3	4	3
206	539	midel school	2	2	2	5	1	2	4	4	4	3	3	2	4	4	3	3	3	4	4	2	3	4	3	2	3	2	4	3
207	142	midel school	3	1	3	5	3	3	3	3	3	3	3	3	3	3	3	3	3	3	3	3	3	3	3	3	3	3	3	3
208	747	midel school	3	1	3	5	1	3	4	4	5	1	5	1	5	4	1	1	5	5	5	1	4	5	5	1	1	5	5	5
209	316	midel school	1	2	3	4	1	3	1	1	4	3	3	4	4	4	3	3	3	3	3	4	3	3	3	3	3	3	4	4
210	1011	midel school	2	2	2	5	1	3	3	3	4	2	1	2	4	4	4	4	4	4	4	3	4	2	4	4	4	4	4	2
211	695	midel school	3	2	2	5	1	3	5	5	3	3	3	3	3	3	3	3	3	3	3	3	3	3	3	3	3	3	3	3
212	464	midel school	3	1	3	5	3	3	2	2	3	3	3	3	3	3	4	3	3	3	3	3	3	3	3	3	3	3	3	3
213	937	midel school	2	1	4	3	1	4	3	3	5	2	2	1	4	1	1	3	5	4	5	5	3	5	5	2	3	2	4	4
214	239	midel school	3	1	2	5	1	3	4	4	5	2	2	4	5	4	2	1	5	4	4	1	2	5	1	2	4	1	4	5
215	110	midel school	3	1	3	5	3	3	3	3	3	3	3	3	3	3	3	3	3	3	3	3	3	3	3	3	3	3	3	3
216	731	midel school	3	2	3	5	1	3	3	3	4	3	4	4	4	4	4	4	5	5	4	3	4	4	5	4	5	4	5	4
217	124	midel school	3	2	2	5	1	3	3	3	3	3	3	4	3	3	4	3	4	3	4	3	3	3	3	3	4	3	4	3
218	383	midel school	3	2	2	5	1	3	2	4	4	1	2	2	5	4	5	3	5	3	3	3	3	3	3	4	4	4	3	3
219	971	midel school	2	1	2	5	1	5	4	4	4	2	2	1	5	4	5	4	4	5	4	1	4	4	5	4	1	4	4	4
220	417	midel school	3	2	4	5	1	4	3	3	3	3	4	3	5	2	4	3	4	3	3	4	3	4	4	3	2	3	4	4
221	249	midel school	3	2	3	5	1	3	4	4	4	4	4	3	4	4	4	4	4	3	4	4	4	3	3	4	4	3	4	3
222	463	midel school	3	1	2	5	1	2	3	3	3	3	3	4	3	3	3	3	3	3	3	3	3	3	3	3	3	3	3	3
223	327	midel school	3	2	2	4	1	3	3	3	4	4	4	3	4	2	4	3	3	3	3	3	3	3	3	3	3	3	3	3
224	557	midel school	1	1	1	5	1	3	3	3	4	4	3	2	5	4	4	4	5	4	4	2	5	4	5	4	5	3	4	4
225	307	midel school	3	1	2	5	1	3	3	3	3	3	3	1	4	3	1	2	2	4	1	1	1	1	4	3	4	1	4	5
226	628	midel school	1	1	3	5	1	4	3	3	4	4	3	4	4	4	4	3	3	4	5	4	3	4	4	3	4	3	3	4
227	550	midel school	2	2	3	5	1	3	3	3	4	4	4	4	4	4	4	4	4	4	4	2	4	2	4	4	4	4	4	4
228	346	midel school	3	2	3	5	1	3	3	3	5	2	4	4	5	4	2	3	3	2	4	3	2	4	4	4	3	4	2	4
229	507	midel school	3	2	3	5	1	4	4	4	4	2	3	2	5	4	2	2	2	2	4	2	2	4	4	4	2	4	2	4
230	1617	midel school	2	2	1	5	1	3	3	3	2	1	1	2	2	5	5	2	1	5	1	3	3	2	1	4	3	3	1	5
231	695	midel school	2	1	2	5	2	3	4	4	2	2	3	1	4	4	4	4	4	4	4	2	3	2	3	4	2	4	2	3
232	679	midel school	1	2	1	5	1	4	3	4	5	5	5	1	5	5	1	1	5	1	5	1	1	5	5	3	1	1	1	5
233	862	midel school	2	1	2	5	1	3	3	3	4	2	2	3	4	4	2	2	4	4	4	2	2	4	4	2	4	2	2	3
234	494	midel school	2	2	5	5	1	5	5	5	5	5	5	5	5	5	5	5	5	3	5	3	2	1	5	1	1	1	5	5
235	751	midel school	1	1	3	5	3	3	4	3	2	3	2	1	1	4	4	1	5	4	4	2	2	3	4	2	2	1	5	4
236	605	midel school	2	2	3	3	1	4	3	4	4	3	4	1	4	2	2	3	5	2	4	2	3	4	5	3	4	3	4	3
237	613	midel school	2	1	3	2	1	3	3	4	3	3	3	3	3	3	3	3	3	4	3	3	3	3	3	4	3	1	4	3
238	594	midel school	3	2	1	5	1	3	3	3	4	1	1	1	4	4	3	1	3	2	5	1	2	2	3	2	2	2	2	3
239	644	midel school	3	1	1	5	1	3	3	3	4	2	1	4	4	4	2	3	4	4	5	2	2	2	1	2	1	1	2	4
240	887	midel school	1	2	1	5	1	4	2	3	3	3	4	5	5	5	1	2	5	1	5	1	1	5	5	5	3	1	1	1
241	735	midel school	3	2	2	5	3	3	3	4	3	4	2	3	4	4	3	2	4	2	3	3	3	3	4	2	2	2	2	3
242	1628	midel school	3	1	2	5	1	3	3	3	3	4	4	3	4	3	4	4	3	4	4	3	4	3	4	3	3	4	4	4
243	429	midel school	2	2	2	5	1	4	4	4	4	4	4	3	5	4	4	4	4	4	4	4	4	4	5	4	4	3	4	4
244	603	midel school	2	1	1	5	2	3	3	3	4	3	1	1	4	3	1	3	4	2	4	2	2	4	4	2	2	4	2	4
245	512	midel school	3	2	3	5	1	4	4	4	5	2	4	2	4	4	4	4	2	4	4	4	2	2	4	4	2	4	4	4
246	550	midel school	3	2	2	5	1	3	4	3	4	2	2	2	3	4	4	2	4	4	4	2	2	4	4	2	2	2	2	2
247	696	midel school	1	1	3	5	1	3	3	3	4	4	2	4	4	4	5	4	3	5	4	3	4	2	4	4	4	2	4	4
248	530	midel school	2	2	2	5	1	3	3	3	4	4	3	3	2	4	2	4	3	3	4	3	3	4	4	2	4	2	2	2
249	546	midel school	1	1	3	5	1	4	3	4	4	4	2	4	4	2	5	4	2	4	4	2	2	4	4	2	2	2	2	4
250	250	midel school	3	1	2	5	1	3	4	5	5	5	5	1	5	2	1	3	3	5	5	1	1	5	5	4	1	2	4	5
251	1167	midel school	1	1	3	5	1	3	3	4	3	1	2	2	4	4	3	2	3	3	3	2	3	4	5	3	2	3	3	4
252	640	midel school	2	1	2	5	1	4	4	4	5	2	2	4	4	4	4	5	3	4	4	2	2	4	5	3	2	5	4	3
253	561	midel school	3	2	3	4	2	3	5	5	4	4	4	3	4	3	2	3	3	2	4	3	3	3	3	3	3	4	2	3
254	1094	midel school	2	1	2	5	1	3	3	3	4	2	3	2	5	2	3	3	5	3	4	4	2	5	5	2	3	3	3	3
255	1388	midel school	2	1	3	5	1	3	3	3	4	2	2	2	4	4	2	4	4	2	3	2	2	4	4	4	2	4	2	5
256	1781	midel school	3	2	4	5	3	3	3	3	4	1	2	4	3	3	4	3	2	4	2	4	4	2	2	3	3	3	4	1
257	677	midel school	2	1	2	5	3	3	3	4	3	3	3	3	4	4	4	3	2	4	5	3	3	3	3	3	3	3	2	4
258	889	midel school	1	1	3	5	1	4	5	5	3	3	2	2	3	4	4	3	3	4	4	2	2	4	3	4	3	3	4	4
259	1495	midel school	3	2	3	5	1	3	3	4	4	3	2	2	4	4	4	3	3	2	4	2	3	3	3	4	3	2	3	3
260	543	midel school	1	2	3	5	2	3	1	1	5	1	5	3	5	5	1	4	5	1	5	1	4	5	5	1	1	4	1	1
261	849	midel school	3	2	4	5	1	3	4	4	2	4	3	4	4	4	4	2	4	4	4	1	4	4	3	2	2	2	4	2
262	543	midel school	3	1	3	5	1	3	3	3	4	4	2	1	4	4	4	2	4	4	2	3	3	4	4	3	3	2	5	4
263	688	midel school	3	1	3	5	1	3	3	3	4	2	2	3	4	4	3	4	3	4	4	2	4	2	4	4	2	1	2	4
264	2776	midel school	2	2	2	5	1	3	2	3	3	3	3	2	4	4	4	2	3	2	4	4	4	2	4	4	4	2	4	4
265	668	midel school	1	1	3	5	1	3	3	4	3	3	3	4	4	4	5	4	2	5	3	3	2	5	2	1	4	2	5	3
266	379	midel school	1	2	1	5	1	3	5	4	4	1	1	1	5	1	1	1	1	1	5	1	1	5	1	1	1	1	1	1
267	544	midel school	1	1	3	5	1	3	3	3	3	2	3	4	3	4	3	4	3	3	3	2	3	2	4	3	4	2	3	2
268	1194	midel school	2	2	3	5	1	3	3	4	4	2	1	2	4	4	3	1	4	4	3	1	2	4	5	4	2	3	2	4
269	2076	midel school	2	2	2	5	2	3	3	4	4	2	1	1	4	2	4	2	4	2	4	2	4	4	4	2	3	1	4	4
270	1260	midel school	3	1	3	5	1	3	3	3	3	2	3	2	4	3	4	1	3	2	3	1	2	3	4	2	2	4	4	2
271	789	midel school	2	1	2	5	1	3	4	4	4	1	3	2	4	1	4	1	5	2	3	3	2	5	5	3	1	2	3	5
272	462	midel school	3	2	4	5	1	3	5	5	1	4	4	3	4	2	4	4	4	5	2	3	3	2	4	4	4	2	5	3
273	538	midel school	3	2	1	4	1	5	3	3	5	5	5	5	5	5	5	5	5	5	5	1	5	5	1	5	5	1	5	5
274	514	midel school	3	2	1	4	3	2	3	5	2	3	3	2	3	4	1	3	1	1	2	2	4	3	3	4	4	3	5	4
275	579	midel school	3	2	1	5	2	3	4	4	4	2	1	2	5	1	2	1	4	1	2	1	1	5	5	1	1	1	1	4
276	385	midel school	3	2	3	5	1	3	3	3	5	1	3	2	5	4	1	4	5	2	4	3	3	4	5	3	3	4	4	4
277	623	midel school	3	1	2	5	1	4	3	4	4	2	2	2	4	3	2	2	4	2	3	1	2	4	3	2	2	2	2	4
278	725	midel school	3	1	3	5	1	3	4	4	5	1	2	1	4	2	2	4	4	2	4	3	2	4	4	1	2	2	4	4
279	560	midel school	3	1	3	5	3	3	3	3	3	3	1	2	4	5	5	3	2	5	5	2	3	1	3	1	2	3	3	3
280	508	high school	4	1	5	4	1	3	4	4	5	2	3	4	5	4	3	5	4	4	2	3	4	3	4	3	3	2	1	1
281	407	midel school	1	1	2	5	1	3	3	3	4	5	3	5	3	5	5	3	4	5	4	1	3	2	5	5	5	3	5	3
282	874	midel school	1	1	2	5	1	3	2	3	4	4	3	2	4	3	2	3	4	3	2	2	3	4	4	2	2	2	4	4
283	786	midel school	3	1	3	5	1	4	3	3	3	4	2	2	4	4	4	2	4	5	4	2	2	2	4	4	2	2	2	4
284	861	midel school	3	2	2	5	2	3	3	4	5	2	4	2	5	5	5	2	5	2	1	5	1	5	5	2	2	3	4	3
285	816	midel school	3	2	1	5	1	3	3	3	1	4	2	4	4	4	4	4	3	1	4	1	3	4	3	3	3	3	4	4
286	565	midel school	1	1	2	5	1	3	3	3	3	3	3	3	5	4	5	3	4	4	4	1	3	3	5	4	3	1	4	4
287	726	midel school	1	2	3	6	3	4	4	4	5	1	3	1	5	1	1	3	5	2	5	1	1	5	5	1	1	3	1	5
288	471	midel school	1	1	2	5	1	4	4	4	4	2	3	2	3	2	5	4	3	5	3	5	3	2	4	4	5	2	5	4
289	1123	midel school	1	1	2	5	1	4	3	4	3	3	3	3	4	4	4	3	3	3	3	2	3	3	3	3	4	3	4	3
290	565	midel school	3	1	3	5	1	3	4	5	5	1	5	1	5	4	4	3	4	4	3	4	4	3	3	3	3	3	4	4
291	723	midel school	3	1	5	4	1	5	5	5	1	1	5	1	5	4	5	1	5	5	3	1	1	1	1	1	1	1	1	1
292	914	midel school	1	2	3	5	1	3	2	2	4	2	2	2	3	4	2	2	4	1	4	1	2	3	5	3	1	1	1	4
293	839	midel school	3	2	2	5	2	2	3	3	4	2	2	2	4	3	5	2	4	2	4	3	4	2	4	2	4	1	2	4
294	720	midel school	3	2	2	5	1	3	3	3	4	2	2	2	4	4	4	4	4	2	4	2	4	4	4	2	2	2	2	2
295	483	midel school	3	1	2	5	1	3	3	3	3	3	2	4	4	4	4	4	2	4	3	4	4	2	2	2	4	2	5	4
296	883	midel school	3	2	2	5	1	3	3	4	3	3	3	3	5	5	4	2	3	1	4	5	4	2	5	3	2	3	5	4
297	216	midel school	3	2	1	5	1	5	5	5	5	5	5	5	5	5	5	5	5	5	5	5	5	5	5	5	5	5	5	5
298	658	midel school	2	2	3	1	1	4	3	3	4	4	3	1	2	2	4	3	3	1	4	2	2	4	4	3	2	2	2	2
299	979	midel school	2	2	3	5	1	4	3	4	4	2	2	1	5	1	1	1	5	1	5	1	1	5	5	2	2	1	4	5
300	1547	midel school	3	1	2	4	1	3	4	4	2	2	1	4	3	5	4	4	2	4	4	4	3	2	3	4	4	2	4	3
301	1206	midel school	1	2	2	5	1	4	3	3	4	3	3	4	4	4	4	4	4	3	4	3	4	4	4	3	3	3	4	4
302	468	midel school	3	1	3	5	3	3	3	3	3	3	2	4	3	4	4	3	3	4	4	4	3	4	4	4	4	2	4	4
303	817	midel school	2	2	3	5	1	3	3	3	3	3	3	3	5	5	5	1	3	3	3	4	2	4	5	2	3	2	5	4
304	386	midel school	2	2	2	5	1	3	4	4	3	3	2	3	2	3	3	2	3	2	4	3	2	2	3	3	3	3	3	3
305	801	midel school	2	2	3	5	3	3	3	4	1	3	1	5	1	5	5	1	1	5	1	3	2	2	3	5	5	3	5	3
306	342	midel school	3	1	3	5	2	3	3	3	4	4	4	4	4	4	4	3	3	5	3	5	4	4	4	4	4	3	4	3
307	619	midel school	2	1	1	5	1	3	3	3	3	3	3	3	4	4	4	4	4	4	4	2	3	4	4	3	3	3	3	4
308	702	midel school	3	1	2	5	1	3	4	4	4	1	1	2	5	4	3	3	5	1	4	1	1	1	1	1	1	1	2	4
309	1982	midel school	2	2	2	1	1	4	4	3	4	1	4	1	4	2	2	1	1	1	4	1	1	5	5	1	1	2	2	1
310	572	midel school	2	2	2	5	2	4	4	3	4	4	3	2	5	3	3	3	5	4	4	1	4	5	5	2	2	1	1	5
311	330	midel school	2	2	3	5	1	4	4	4	2	4	1	1	3	4	3	3	3	3	3	3	3	3	3	3	3	3	3	3
312	550	midel school	2	1	2	5	1	3	4	4	3	3	2	3	4	4	4	4	4	4	4	4	4	3	4	4	3	3	3	3
313	1111	midel school	2	1	2	5	1	4	3	3	5	4	3	2	5	1	3	3	3	1	3	1	1	5	5	3	3	3	4	4
314	697	midel school	3	2	2	5	1	4	3	4	4	1	3	1	4	4	1	1	2	3	3	1	3	3	3	1	3	3	4	3
315	850	midel school	2	2	1	5	1	3	3	3	2	2	4	2	4	3	3	3	4	2	4	3	3	3	3	2	2	2	2	3
316	1007	midel school	2	2	1	5	1	4	4	3	4	4	3	4	4	3	4	4	4	3	4	3	3	4	4	4	4	4	3	3
317	551	midel school	2	1	1	5	1	3	4	4	5	1	3	1	5	4	4	1	4	4	2	4	4	2	4	1	1	3	4	4
318	637	midel school	3	1	3	5	1	3	3	3	2	4	2	1	4	4	4	3	2	4	4	2	4	2	4	4	4	3	4	4
319	551	midel school	2	2	2	5	1	2	4	4	4	3	4	3	4	3	2	4	5	5	4	2	1	4	2	1	4	4	3	4
320	1001	midel school	1	1	3	5	1	1	1	1	3	3	2	4	4	4	4	4	3	4	3	3	4	3	3	3	3	2	2	2
321	1341	midel school	3	1	3	5	1	3	3	3	2	2	2	2	4	3	4	1	3	3	3	1	2	3	4	2	3	3	4	2
322	515	midel school	3	1	3	5	1	3	3	3	3	3	3	4	4	4	4	3	2	5	3	3	4	3	3	4	4	4	4	3
323	5384	midel school	2	1	3	5	3	3	3	3	3	4	4	4	3	3	5	5	3	5	5	5	3	3	3	5	5	3	5	3
324	715	midel school	2	2	3	5	1	3	3	3	2	3	1	2	4	4	4	3	4	2	2	2	3	2	4	3	2	1	2	2
325	321	midel school	1	1	3	5	1	3	3	3	3	3	3	3	3	3	3	3	3	3	3	3	3	3	3	3	3	3	3	3
326	269	midel school	2	2	3	5	1	3	3	3	3	3	3	3	3	3	3	3	3	3	3	3	3	3	3	3	3	3	3	3
327	1430	midel school	3	1	3	5	1	2	3	3	2	4	2	4	2	5	5	2	2	4	3	3	4	2	4	5	4	2	5	3
328	423	midel school	2	1	3	5	1	3	3	2	4	3	1	2	5	4	4	5	4	4	4	2	3	4	4	4	3	4	2	4
329	733	midel school	1	1	3	5	1	3	3	3	4	3	2	3	3	4	4	3	3	4	4	2	4	4	4	4	3	3	4	4
330	701	midel school	2	2	2	5	1	5	4	3	5	1	3	1	5	2	1	1	5	1	3	1	1	5	4	1	1	1	1	4
331	632	midel school	3	2	2	5	2	3	3	3	4	2	2	2	2	1	1	1	4	2	4	2	2	1	4	2	2	4	1	4
332	376	midel school	3	2	4	5	1	3	3	3	5	4	3	3	3	4	2	4	2	2	4	3	4	2	1	2	4	4	2	2
333	928	midel school	2	2	1	5	1	2	3	3	3	4	2	3	3	4	4	4	3	2	2	3	3	2	4	4	4	2	4	3
334	1099	midel school	1	2	3	5	1	3	3	3	2	3	2	3	4	4	2	2	3	2	2	3	4	2	3	2	3	2	2	4
335	485	midel school	2	1	4	5	1	3	3	3	4	4	4	4	4	4	4	4	4	4	3	2	2	4	4	3	3	1	5	4
336	559	midel school	3	1	2	5	3	3	3	3	2	4	2	1	2	4	4	4	3	5	3	3	4	4	4	4	3	4	5	3
337	607	midel school	1	2	3	5	1	4	3	3	3	3	3	3	3	3	3	3	3	3	3	3	3	3	3	3	2	2	4	3
338	749	midel school	3	2	2	5	1	2	4	3	3	3	3	2	4	4	4	3	4	3	3	3	3	4	5	4	3	3	3	4
339	1159	midel school	2	1	3	5	1	4	4	4	4	2	5	4	5	2	4	4	4	1	5	4	4	4	4	4	4	4	1	4
340	3430	midel school	3	2	2	5	1	3	4	4	3	4	3	2	3	2	3	2	2	3	3	3	3	3	3	3	4	4	3	3
341	730	midel school	1	2	1	5	1	4	4	4	5	4	3	4	4	3	3	4	4	3	2	1	2	3	3	4	4	1	4	4
342	506	midel school	3	2	2	5	3	3	4	3	3	3	3	4	5	3	2	4	3	3	4	3	3	4	5	3	3	3	2	3
343	887	midel school	2	2	3	5	1	3	3	3	4	1	3	1	4	1	2	1	2	1	4	1	1	4	4	1	1	1	3	1
344	860	midel school	2	2	1	5	1	3	3	3	3	3	3	1	3	1	1	5	3	4	5	1	3	3	3	3	3	3	1	4
345	690	midel school	3	1	2	5	2	3	4	5	2	4	1	3	5	4	5	4	4	5	3	5	4	5	5	5	4	1	5	4
346	480	midel school	2	2	2	5	2	2	2	2	4	4	3	4	4	4	4	4	4	2	4	3	4	3	4	4	2	3	3	4
347	230	midel school	3	2	3	5	1	3	3	3	3	3	3	3	3	3	3	3	3	3	3	3	3	3	3	3	3	3	3	3
348	500	midel school	2	2	2	5	1	2	3	3	2	3	2	2	2	4	4	2	2	2	2	2	4	2	2	4	4	2	2	2
349	443	midel school	3	1	3	5	1	4	5	5	5	2	4	3	3	3	4	4	4	4	4	3	3	3	3	3	3	1	4	4
350	854	midel school	2	2	2	5	1	4	3	3	4	3	3	2	4	4	4	3	2	2	4	4	2	4	4	3	2	4	4	4
351	540	midel school	2	1	1	5	2	3	5	4	4	2	2	1	4	4	2	2	4	4	5	3	3	4	4	2	3	2	2	4
352	865	midel school	1	2	2	5	1	3	4	4	4	1	2	2	4	2	3	3	4	2	4	3	3	4	3	3	3	2	3	3
353	778	midel school	1	2	3	5	3	2	3	3	3	3	3	4	4	5	5	1	1	4	3	4	1	2	2	3	2	2	3	3
354	1317	midel school	1	1	3	5	1	3	3	3	5	1	1	1	5	4	1	5	5	5	5	2	1	5	5	1	1	5	1	5
355	799	midel school	3	1	2	5	1	3	3	3	3	4	3	4	3	4	2	3	4	4	5	1	5	5	5	1	1	1	1	3
356	695	midel school	1	2	2	2	1	5	4	5	4	2	4	1	4	4	2	4	5	2	4	1	2	5	5	2	1	4	1	5
357	716	midel school	2	1	3	5	1	3	3	3	3	2	2	3	4	4	4	3	4	3	3	4	4	3	3	3	3	3	3	4
358	676	midel school	3	2	3	5	2	3	3	3	4	3	4	2	4	4	4	3	3	2	3	2	3	4	4	4	4	3	2	4
359	692	midel school	3	1	3	5	2	3	2	3	3	3	3	1	5	1	1	1	3	1	3	3	3	3	3	3	3	3	1	5
360	1160	midel school	2	1	2	5	1	3	3	4	4	2	3	2	4	4	4	2	5	2	4	1	2	4	5	4	4	2	4	4
361	433	midel school	1	2	3	5	1	4	5	5	5	1	1	1	5	1	1	1	5	1	5	1	1	5	5	1	1	1	1	5
362	687	midel school	2	2	1	5	1	3	3	4	4	3	4	2	4	4	3	3	4	3	4	2	2	4	4	3	2	4	2	4
363	740	midel school	3	2	2	4	1	3	3	4	2	1	1	2	4	4	2	4	4	1	4	1	3	4	3	1	2	2	3	4
364	554	midel school	3	1	2	5	1	3	3	3	4	4	3	2	5	5	5	1	2	5	5	4	5	4	5	4	3	1	5	5
365	3297	midel school	3	2	2	5	1	4	5	5	5	1	3	3	3	4	4	1	4	1	5	5	2	4	4	3	3	5	3	4
366	529	midel school	3	1	2	5	1	4	3	3	3	2	3	2	4	4	4	3	3	3	4	2	3	4	3	2	2	3	3	4
367	148	midel school	2	2	1	5	2	1	1	1	1	1	1	1	1	1	1	1	1	1	1	1	1	1	1	1	1	1	1	1
368	370	midel school	3	1	3	5	2	3	3	5	2	5	1	4	3	4	5	3	1	4	3	2	3	1	4	3	4	3	4	3
369	516	midel school	2	1	2	5	1	3	3	3	3	3	3	3	3	3	3	3	4	4	3	3	3	3	3	3	3	3	4	3
370	728	midel school	2	1	3	5	1	3	4	4	5	3	3	2	4	4	5	3	4	3	1	3	2	3	5	3	4	3	5	1
371	701	midel school	1	2	3	5	2	3	3	5	4	2	4	1	4	4	2	2	5	2	5	4	2	4	4	2	1	1	2	4
372	1090	midel school	1	1	1	5	1	3	3	4	4	1	3	1	5	2	3	3	4	3	3	2	2	4	4	2	1	3	4	4
373	1070	midel school	1	1	3	5	1	5	5	5	5	1	3	1	5	3	1	1	5	1	4	1	2	5	5	4	1	4	3	4
374	500	midel school	2	1	3	4	2	4	3	4	3	4	3	4	3	5	5	5	3	5	5	3	4	5	5	5	5	3	5	3
375	584	midel school	2	1	2	5	1	3	3	3	5	5	1	5	5	5	5	3	3	5	5	1	4	3	3	4	2	2	2	3
376	1489	midel school	3	2	2	5	1	3	3	4	4	1	1	1	5	4	1	1	5	1	4	2	4	3	4	3	1	3	1	4
377	471	midel school	3	2	1	5	2	4	3	5	3	3	3	3	3	3	3	3	3	3	4	4	4	4	4	3	4	3	3	4
378	824	midel school	2	2	1	5	1	3	3	4	5	5	1	1	5	1	1	1	1	1	5	2	3	5	1	5	1	1	1	1
379	506	midel school	1	1	3	5	1	2	3	2	3	5	2	5	3	5	5	3	2	5	5	5	5	4	4	4	5	2	4	4
380	711	midel school	2	1	3	5	1	5	4	5	1	5	1	5	4	5	5	2	4	5	2	4	4	4	4	4	4	4	4	4
381	715	midel school	2	2	1	5	2	3	3	3	4	2	1	2	2	2	4	3	2	1	4	4	2	4	4	5	2	1	4	4
382	753	midel school	2	1	2	5	1	3	4	4	3	2	2	3	4	4	4	3	4	4	4	2	3	4	5	3	4	1	3	2
383	444	midel school	2	2	2	5	1	3	3	3	2	2	3	2	4	3	4	3	3	2	3	2	2	4	4	3	2	2	2	4
384	839	midel school	3	2	5	5	1	4	4	5	4	1	2	1	5	2	3	2	5	1	4	3	2	2	5	3	2	1	2	4
385	473	midel school	1	2	2	5	3	3	5	5	3	3	3	3	3	3	3	3	3	3	3	3	3	3	3	3	3	3	3	3
386	923	midel school	1	1	2	5	1	4	4	4	4	3	2	1	4	2	2	2	3	2	3	2	2	3	4	2	3	1	3	3
387	884	midel school	1	2	2	5	1	3	3	3	4	2	4	2	4	4	4	2	2	2	2	3	3	3	4	4	4	3	3	3
388	632	midel school	1	2	2	5	1	3	3	3	3	3	3	3	4	3	3	4	3	3	4	3	3	3	3	2	1	2	2	2
389	976	midel school	1	1	1	5	1	3	3	4	2	1	1	1	4	4	1	4	4	1	3	1	3	3	4	2	3	2	3	3
390	922	midel school	3	1	3	5	1	3	3	4	2	3	3	3	3	4	3	3	3	2	3	3	3	3	3	3	3	3	3	3
391	459	midel school	3	2	2	5	3	3	3	3	5	1	1	3	3	4	1	4	2	4	5	1	4	4	1	1	2	2	4	4
392	1005	midel school	1	1	2	5	1	4	3	3	3	3	1	1	5	4	3	3	4	4	5	2	3	3	4	3	3	2	3	4
393	1050	midel school	1	1	2	5	1	5	5	5	4	4	4	1	5	3	1	3	5	3	5	1	2	3	5	3	1	1	3	3
394	750	midel school	1	2	3	5	1	3	3	3	3	3	3	3	3	3	3	3	3	3	3	3	3	3	3	3	3	3	3	3
395	1119	midel school	3	2	3	5	2	5	3	4	3	2	2	3	4	4	4	4	4	1	4	2	4	4	4	4	3	4	4	2
396	461	midel school	1	2	3	5	2	3	2	2	4	4	3	3	3	3	3	3	3	3	3	3	3	3	3	3	3	3	3	3
397	1032	midel school	3	2	1	5	1	4	4	5	1	1	2	3	5	5	3	3	4	4	5	1	3	5	4	3	5	1	4	2
398	376	midel school	3	1	2	5	1	3	4	4	4	4	4	2	4	2	2	2	3	1	5	3	4	3	3	2	2	2	1	1
399	452	midel school	1	1	3	5	1	2	3	3	2	3	2	2	2	4	4	4	4	4	4	4	4	4	4	4	4	4	4	4
400	628	midel school	2	1	3	5	1	4	4	4	4	2	3	1	4	2	4	3	3	4	4	1	1	3	3	1	2	1	3	4
401	942	midel school	1	1	3	5	1	3	3	3	4	4	3	2	4	4	4	3	3	4	3	2	3	3	3	3	3	2	3	3
402	852	midel school	1	1	1	5	1	4	3	3	2	2	1	1	4	4	2	2	1	2	3	1	2	3	3	3	4	1	3	2
403	666	midel school	1	1	3	5	3	3	2	4	4	3	5	2	5	4	3	5	3	2	3	5	1	5	4	1	3	5	5	2
404	395	midel school	3	2	3	5	1	3	5	5	3	3	3	3	3	3	3	3	3	3	3	3	3	3	3	3	3	4	5	5
405	759	midel school	1	1	2	5	3	4	5	4	4	3	3	3	4	4	4	2	3	4	4	2	2	3	3	2	2	2	2	4
406	882	midel school	3	2	4	5	1	3	2	2	2	5	2	2	2	5	5	1	1	1	3	5	3	4	4	5	5	5	5	4
407	804	midel school	3	2	5	5	1	2	2	2	2	2	1	3	2	2	3	5	1	1	3	1	1	5	1	5	1	5	5	1
408	787	midel school	2	2	3	5	1	2	3	3	2	3	2	3	3	5	5	2	2	4	3	5	4	1	3	4	4	2	5	3
409	823	midel school	1	2	2	5	1	3	4	4	5	1	3	1	5	3	1	5	5	3	5	1	1	5	5	1	1	1	1	5
410	1382	midel school	1	1	2	5	1	3	5	3	5	1	5	1	3	3	3	1	3	3	3	3	3	3	5	2	3	1	1	1
411	942	midel school	3	2	2	5	1	3	1	1	4	2	3	3	4	3	2	2	3	2	4	3	3	4	4	2	2	2	3	3
412	1406	midel school	1	1	3	5	1	3	3	4	2	3	4	2	4	2	4	3	3	3	4	3	3	4	3	3	3	4	5	4
413	640	midel school	1	1	3	5	1	3	3	3	5	3	3	1	5	1	4	3	3	1	5	1	1	3	5	1	4	1	4	1
414	808	midel school	2	1	1	5	1	3	4	4	2	4	3	2	5	5	5	3	3	4	1	3	2	3	5	4	5	3	1	2
415	733	midel school	3	1	3	5	1	2	3	4	3	4	2	3	3	3	2	3	4	4	4	3	3	3	4	3	4	1	4	4
416	798	midel school	3	2	2	5	1	4	3	4	4	2	4	2	4	2	3	3	4	1	4	1	2	4	4	2	2	3	1	5
417	1449	midel school	1	2	1	5	1	4	3	4	5	1	5	1	5	5	1	1	5	1	5	1	1	5	5	1	1	1	1	5
418	1113	midel school	3	2	4	5	1	3	3	3	5	1	3	1	5	1	1	3	3	1	5	1	2	4	4	1	1	1	2	4
419	1411	midel school	2	2	2	5	1	3	3	3	4	4	4	4	4	4	4	4	4	5	3	4	4	3	4	4	4	4	4	4
420	1835	midel school	1	2	4	5	1	2	4	4	3	3	3	4	3	4	4	4	4	3	4	3	3	3	5	3	4	3	3	4
421	543	midel school	1	1	3	5	1	2	3	3	3	3	3	3	4	4	4	3	3	3	3	3	3	3	4	3	3	3	4	3
422	333	midel school	2	2	3	5	1	3	4	3	4	4	4	3	4	4	4	4	4	4	4	4	4	4	4	4	4	4	4	4
423	463	midel school	1	1	3	5	1	3	3	4	3	4	3	2	4	4	3	3	3	4	4	2	3	3	4	3	3	3	4	4
424	964	midel school	1	2	4	5	2	2	2	3	2	3	1	4	2	4	4	2	2	3	4	3	4	2	4	3	4	3	4	2
425	1269	midel school	1	2	2	5	1	5	3	3	5	1	3	4	5	4	1	1	5	1	4	1	1	5	4	4	1	2	1	3
426	501	midel school	2	1	3	5	1	3	3	3	3	3	3	1	4	2	5	3	3	4	2	3	4	2	2	4	5	2	5	3
427	430	midel school	3	1	2	4	1	3	3	3	2	3	2	4	3	5	4	4	2	4	4	4	3	2	2	3	4	2	4	3
428	588	midel school	2	1	3	5	1	4	3	3	4	3	3	4	4	4	4	3	3	4	4	4	3	3	4	2	3	3	4	4
429	844	midel school	2	2	2	5	1	3	3	3	4	2	4	2	4	2	2	2	4	2	2	2	2	4	4	2	2	4	2	4
430	873	midel school	1	1	3	5	3	4	3	4	2	3	2	2	4	3	4	4	3	4	4	3	3	3	4	4	4	3	3	4
431	372	midel school	3	2	2	5	2	3	3	3	4	3	3	4	4	4	3	4	4	2	4	2	3	4	4	2	2	2	2	3
432	532	midel school	3	1	2	4	1	3	3	4	2	2	1	4	3	4	4	4	2	4	4	4	3	2	3	2	4	2	4	3
433	632	midel school	1	2	2	5	1	2	3	4	5	3	2	1	3	4	2	4	4	1	4	1	2	3	4	4	4	2	2	5
434	427	midel school	1	2	3	5	1	3	3	3	2	4	2	3	1	5	4	2	1	5	2	2	5	2	1	4	4	5	5	4
435	415	midel school	1	1	1	5	1	3	3	3	3	3	3	3	5	4	3	2	3	3	3	3	3	3	3	3	3	3	3	3
436	497	midel school	1	1	2	5	1	3	5	5	5	1	3	1	5	5	3	2	4	1	5	1	1	5	5	1	1	1	1	4
437	532	midel school	1	1	2	5	1	3	3	3	4	4	3	1	3	3	5	3	3	1	4	1	1	4	5	4	4	3	3	4
438	574	midel school	1	1	1	5	2	4	3	3	5	1	5	3	5	1	1	1	5	1	3	2	1	5	5	1	1	3	1	5
439	1013	midel school	2	1	3	5	1	3	4	5	2	4	1	4	2	5	5	4	2	5	4	2	2	3	3	4	4	2	4	5
440	1558	midel school	3	1	2	5	1	3	4	4	3	4	3	3	2	4	4	3	3	5	4	2	4	2	4	4	4	2	4	3
441	589	midel school	2	2	2	5	3	3	1	1	4	3	3	3	3	4	4	3	3	4	4	4	4	4	5	5	5	4	2	3
442	492	midel school	1	1	2	5	1	3	3	3	4	3	3	2	4	3	4	2	4	4	4	2	3	3	4	2	2	2	3	4
443	529	midel school	1	2	2	5	1	2	2	3	4	4	4	4	4	4	4	4	4	4	4	3	3	3	3	2	3	3	3	3
444	1067	midel school	1	1	4	5	1	3	3	3	4	2	2	1	5	3	3	2	4	3	3	3	4	4	4	3	2	2	4	4
445	582	midel school	1	2	1	5	1	5	3	5	4	3	3	3	4	5	4	3	3	1	4	1	3	2	2	3	3	2	3	4
446	1055	midel school	1	2	2	5	1	3	3	3	5	1	2	3	4	4	2	2	4	2	2	2	2	4	5	2	1	5	2	4
447	625	midel school	1	2	1	5	1	4	4	5	4	1	2	1	5	1	1	1	4	1	3	1	2	5	5	1	2	1	1	3
448	726	midel school	1	2	2	5	2	3	3	3	3	3	3	4	3	4	4	3	3	2	3	2	3	4	3	3	4	3	3	3
449	716	midel school	1	2	2	5	1	4	3	3	3	4	1	5	4	5	5	2	4	4	5	3	3	4	5	5	4	5	4	5
450	810	midel school	1	2	3	5	2	3	3	3	1	3	3	3	4	3	3	4	3	3	2	3	3	2	3	3	3	2	4	2
451	679	midel school	2	2	2	5	3	4	3	2	3	3	3	3	4	3	3	3	3	2	3	2	3	3	2	3	3	3	2	3
452	599	midel school	3	2	2	5	1	2	2	2	4	3	4	5	4	5	3	5	5	3	4	2	3	5	5	5	4	5	5	5
453	4008	midel school	1	2	1	5	1	5	5	5	5	1	5	1	5	5	1	1	5	1	5	1	1	5	5	1	1	1	1	5
454	645	midel school	1	2	3	5	1	1	3	3	4	3	2	1	3	4	4	4	2	4	2	5	1	2	3	4	2	3	4	4
455	1006	midel school	2	1	4	5	3	3	3	4	5	1	3	1	5	4	5	3	5	3	3	1	1	5	5	4	1	4	4	3
456	930	midel school	3	2	2	5	1	2	1	3	4	2	2	3	4	5	1	1	1	5	5	1	5	5	4	5	5	1	3	5
457	597	midel school	3	1	2	5	2	3	3	3	3	1	4	2	5	3	5	3	4	3	5	1	1	3	4	1	1	5	1	3
458	569	midel school	3	1	1	5	1	4	3	3	4	4	3	1	5	2	3	3	3	4	4	1	2	3	4	3	1	2	3	3
459	512	midel school	1	1	3	6	1	3	2	2	5	3	4	3	4	4	5	3	5	5	4	4	4	4	4	4	4	3	4	3
460	623	midel school	3	2	3	5	1	3	3	3	3	2	1	1	4	2	2	2	2	1	3	2	2	3	3	2	2	2	3	2
461	836	midel school	1	2	1	5	1	4	3	3	5	1	1	1	5	1	1	1	5	1	3	1	1	5	5	1	3	1	1	1
462	353	midel school	1	2	3	5	1	2	2	3	4	2	5	2	4	4	2	5	3	2	4	2	3	3	2	1	5	2	4	2
463	428	midel school	3	1	3	5	1	3	3	3	2	3	3	2	4	4	2	2	2	2	4	2	2	3	4	4	2	2	3	2
464	638	midel school	2	1	3	5	1	3	2	3	4	2	2	3	4	4	3	3	3	2	3	2	3	3	4	2	3	3	3	3
465	514	midel school	3	1	2	5	1	3	4	4	4	2	2	2	4	2	3	2	2	4	4	2	2	4	4	4	2	1	4	3
466	566	midel school	3	2	3	5	3	2	3	3	3	3	3	3	3	3	3	3	3	3	3	3	3	3	3	3	3	3	3	3
467	300	midel school	3	1	4	5	2	3	3	3	3	3	3	3	3	3	3	3	3	3	3	3	3	3	3	3	3	3	3	3
468	453	midel school	3	2	3	5	3	3	3	3	3	3	3	3	3	3	3	3	3	3	4	3	3	3	3	3	3	3	3	3
469	884	midel school	1	2	2	5	2	4	5	5	5	1	1	1	5	4	1	1	5	1	5	1	1	5	4	1	1	1	2	5
470	429	midel school	1	2	4	5	3	3	3	3	5	2	3	3	3	2	2	3	3	2	3	3	3	2	3	4	4	2	4	2
471	181	midel school	3	2	3	4	2	4	3	3	3	3	3	3	3	3	3	3	3	3	3	3	3	3	3	3	3	3	3	3
472	328	midel school	3	2	2	4	1	2	3	3	4	4	4	4	4	4	4	4	4	2	2	4	4	4	4	4	4	4	4	4
473	635	midel school	1	1	2	5	1	4	3	3	3	3	3	3	3	3	3	3	3	2	3	3	3	3	4	3	4	3	3	4
474	479	midel school	2	2	3	5	1	4	3	3	3	3	3	3	3	3	3	3	3	3	3	3	3	3	3	3	3	3	3	3
475	592	midel school	3	2	1	5	1	4	3	3	4	4	3	2	4	4	4	2	4	2	4	4	4	4	4	3	2	2	4	4
476	708	midel school	1	2	1	5	1	3	4	3	5	1	4	1	5	1	1	1	3	1	3	1	1	2	3	2	1	1	1	2
477	990	midel school	2	2	3	5	1	4	2	3	4	2	2	2	4	4	4	3	2	1	4	2	3	4	2	4	2	4	2	3
478	802	midel school	1	2	3	5	3	3	4	4	3	2	2	1	4	4	2	4	3	1	5	1	1	5	4	1	2	2	1	5
479	550	midel school	1	1	2	5	1	3	4	4	4	3	1	1	4	2	5	3	4	2	3	1	2	1	1	3	1	1	3	5
480	1052	midel school	1	2	3	5	1	3	3	4	4	1	2	1	4	1	2	2	4	1	4	1	2	4	4	2	2	1	2	2
481	508	midel school	1	2	2	5	2	4	5	3	5	1	4	2	5	2	4	2	5	2	4	2	4	4	4	4	1	5	2	4
482	926	midel school	3	2	1	5	1	3	4	4	5	1	5	1	5	4	1	5	5	2	4	2	2	4	5	2	1	1	2	5
483	233	midel school	1	2	3	5	1	2	4	5	4	2	3	2	4	2	1	3	2	3	2	3	2	3	2	2	3	3	2	2
484	748	midel school	1	2	2	5	1	4	4	4	5	3	4	2	4	2	5	3	4	3	4	2	4	4	4	3	3	2	2	2
485	831	midel school	1	1	3	4	1	5	4	4	2	4	2	2	4	4	5	2	3	5	3	4	4	2	3	4	3	1	4	4
486	1114	midel school	2	2	2	5	3	4	3	4	4	2	2	2	4	4	2	4	4	4	4	2	4	2	4	2	1	2	2	4
487	483	midel school	2	2	3	5	3	4	3	3	5	1	1	5	5	5	5	1	3	5	5	1	1	5	3	1	3	3	4	2
488	1112	midel school	1	2	3	5	1	4	3	4	4	2	3	3	4	4	4	3	4	4	3	2	4	4	4	4	4	2	4	3
489	701	midel school	2	1	3	5	1	3	3	3	3	3	3	3	3	4	3	3	3	4	4	3	3	3	3	3	3	3	3	3
490	688	midel school	1	1	2	5	1	3	3	3	4	2	4	3	5	5	5	2	4	4	4	5	4	5	2	5	4	1	4	1
491	494	midel school	3	1	2	5	1	4	4	4	4	3	3	3	4	2	1	3	3	4	2	3	3	3	3	3	3	1	3	4
492	846	midel school	1	2	2	5	1	1	3	3	4	1	2	1	5	5	1	5	5	5	5	1	5	5	5	1	5	5	5	5
493	970	midel school	1	2	3	5	1	3	3	3	3	3	1	3	4	4	4	4	4	4	4	3	3	4	4	3	3	4	4	4
494	475	midel school	1	2	3	5	1	5	5	5	4	2	3	3	5	3	1	2	3	2	3	2	2	3	3	3	3	3	3	3
495	850	midel school	1	1	2	5	1	4	3	3	5	3	2	2	5	4	2	2	4	2	4	1	2	2	5	2	3	1	4	4
496	637	midel school	1	1	2	5	1	3	3	3	5	2	3	2	5	4	5	4	5	5	5	2	3	3	4	3	4	2	5	4
497	795	midel school	2	2	3	4	1	4	3	3	4	2	3	2	5	4	2	3	4	2	4	4	2	4	4	4	2	2	2	2
498	490	midel school	2	1	2	5	1	3	4	4	2	4	2	2	2	4	4	4	2	5	2	5	3	2	2	2	2	2	2	1
499	544	midel school	3	2	2	5	2	3	3	5	5	1	1	3	5	4	1	4	4	1	2	2	2	5	5	5	5	1	1	4
500	3350	midel school	2	1	3	5	1	3	3	3	5	3	3	1	5	1	1	1	3	1	4	1	2	3	2	2	1	1	1	4
501	590	midel school	1	1	3	3	1	3	5	5	3	3	3	4	3	4	4	1	3	3	3	1	1	4	4	4	1	3	1	5
502	568	midel school	2	1	2	5	2	3	3	3	4	4	4	4	4	4	4	4	4	4	4	3	3	3	3	3	3	3	2	3
503	575	midel school	1	2	2	5	1	3	3	4	4	2	1	1	5	1	1	5	1	1	5	1	5	1	5	5	1	1	1	1
504	607	midel school	1	1	1	5	1	3	3	3	3	2	3	3	4	3	3	3	3	2	4	2	3	3	4	2	2	2	2	4
505	376	midel school	2	1	2	5	1	4	4	4	4	4	4	3	4	3	2	4	3	3	4	3	3	4	4	4	3	3	4	4
506	789	midel school	1	2	2	5	3	4	3	3	4	3	3	4	3	4	4	3	3	3	4	2	4	3	4	3	4	3	4	4
507	1050	midel school	1	1	2	5	1	5	4	5	4	1	3	2	5	3	2	3	4	2	4	2	2	4	5	2	2	1	2	2
508	473	midel school	2	1	1	5	1	4	4	5	5	1	1	1	5	1	1	1	5	1	5	1	1	5	3	1	2	1	1	2
509	368	midel school	1	1	1	5	1	3	4	3	3	3	3	1	4	3	3	3	3	1	5	3	3	5	2	3	3	3	1	3
510	885	midel school	2	2	2	5	1	3	4	4	4	1	2	2	4	4	1	4	4	2	2	2	2	4	4	1	2	1	2	2
511	533	midel school	3	2	3	5	1	3	3	3	3	3	3	3	3	3	3	3	3	3	3	3	3	3	3	3	3	3	3	3
512	392	midel school	2	2	2	5	1	2	3	3	1	5	1	5	1	5	5	1	1	5	1	3	5	5	1	5	5	1	5	3
513	331	midel school	1	1	3	4	1	5	4	1	2	2	2	1	1	2	2	1	4	1	1	1	1	1	1	1	1	2	3	1
514	512	midel school	3	2	2	5	1	3	3	3	5	2	4	4	4	4	4	3	4	3	3	1	2	4	4	1	3	1	2	4
515	348	midel school	1	1	3	5	1	4	3	3	3	3	3	3	3	3	3	3	3	3	3	3	3	3	3	3	3	3	3	3
516	412	midel school	2	2	2	5	1	4	3	3	5	3	3	3	3	3	3	3	3	3	3	3	3	3	3	3	3	3	3	3
517	981	midel school	1	1	2	5	1	3	4	3	5	2	4	1	5	2	1	4	5	4	4	1	2	5	4	1	1	2	2	2
518	884	midel school	2	2	1	5	1	4	5	5	4	1	1	1	5	1	1	1	4	4	4	1	1	5	5	1	3	3	3	4
519	513	midel school	1	2	2	5	1	3	3	4	3	3	3	3	4	2	3	3	3	3	3	3	3	3	3	3	3	3	3	3
520	646	midel school	1	1	2	5	1	3	3	3	4	2	2	1	5	3	4	1	4	3	4	1	1	3	4	4	1	1	4	4
521	791	midel school	2	2	2	5	3	3	3	3	3	3	3	2	4	4	4	1	3	2	4	3	3	4	3	3	3	3	3	3
522	570	midel school	3	1	2	5	1	3	4	4	4	2	2	2	4	4	2	2	4	4	4	2	4	4	4	2	4	2	4	4
523	834	midel school	1	2	2	5	1	2	1	1	3	3	4	3	4	4	2	4	2	2	3	3	4	4	4	2	2	4	3	2
524	712	midel school	1	2	2	5	1	4	3	3	5	3	1	1	5	2	3	3	4	5	5	2	4	4	4	5	4	3	4	3
525	1326	midel school	1	1	2	5	1	3	4	5	4	4	2	4	5	4	5	2	4	1	4	2	4	4	5	4	2	1	4	4
526	433	midel school	2	2	3	4	2	3	2	2	3	4	4	4	2	2	4	4	4	4	4	2	4	4	4	2	2	4	2	3
527	1510	midel school	2	1	2	5	1	3	3	3	4	1	1	1	4	2	2	1	2	3	3	2	3	4	4	3	3	3	1	4
528	882	midel school	3	2	2	5	3	3	4	4	3	2	2	2	5	5	1	4	2	3	4	1	2	4	5	3	2	2	4	3
529	511	midel school	2	1	2	5	1	4	5	5	5	1	3	1	5	5	3	2	5	1	5	1	1	5	5	3	3	1	1	3
530	506	midel school	1	2	2	5	1	4	2	2	5	5	3	3	3	3	3	3	3	3	3	3	3	3	3	3	3	3	3	3
531	412	midel school	1	2	4	5	3	3	5	1	3	3	3	3	3	3	3	3	4	3	3	3	3	3	3	3	3	3	3	3
532	595	midel school	1	2	2	2	1	4	4	4	4	2	3	2	4	2	2	2	4	1	2	2	2	4	5	2	3	3	3	4
533	684	midel school	1	2	2	5	1	5	3	5	3	3	3	3	3	3	3	3	3	3	3	3	3	3	3	3	3	3	4	3
534	418	midel school	1	1	3	5	1	3	3	3	5	3	3	3	3	3	3	3	4	3	3	3	3	3	3	3	3	3	4	3
535	607	midel school	3	1	3	5	1	3	3	3	5	1	2	1	5	4	1	1	5	1	4	2	1	1	5	1	1	2	1	2
536	814	midel school	1	2	2	5	1	3	3	3	4	3	3	3	4	4	2	3	4	4	4	3	3	4	2	4	4	1	2	3
537	423	midel school	1	2	1	5	1	3	4	4	5	1	1	1	5	5	2	2	5	4	4	2	2	5	5	5	2	1	1	4
538	781	midel school	1	1	2	5	1	3	1	3	5	1	3	4	5	5	1	2	3	3	5	2	3	3	4	2	2	1	1	4
539	769	midel school	2	1	2	5	2	3	3	5	2	2	1	1	5	5	5	3	4	4	4	2	3	4	4	3	2	3	3	5
540	843	midel school	1	1	2	5	1	3	3	3	4	2	2	2	4	4	2	2	3	2	4	3	4	4	4	2	2	2	2	3
541	974	midel school	1	1	3	5	1	3	3	4	4	2	2	1	5	4	1	3	4	2	2	1	2	4	5	2	2	2	4	2
542	474	midel school	1	2	1	5	3	3	3	3	3	3	3	3	3	3	3	3	3	3	3	2	4	2	4	2	3	4	2	4
543	855	midel school	1	2	1	5	1	3	3	3	5	1	1	1	5	5	1	1	5	1	5	1	1	5	5	1	1	1	1	1
544	1013	midel school	2	1	3	5	2	3	3	3	3	3	3	2	3	4	2	3	4	3	4	2	4	3	3	2	3	4	3	4
545	873	midel school	2	2	1	5	1	3	3	3	4	3	3	1	4	4	5	4	3	1	3	2	3	3	4	2	4	1	3	3
546	1135	midel school	1	1	3	5	1	4	4	4	4	2	3	1	3	3	3	2	3	1	4	2	3	3	3	3	3	2	1	3
547	374	midel school	2	1	3	5	1	3	3	3	4	4	4	4	4	4	4	4	4	4	4	4	4	4	4	4	4	4	4	4
548	1562	midel school	1	2	1	5	1	4	3	3	4	3	3	1	5	5	1	4	4	5	3	1	1	5	4	4	4	5	5	3
549	683	midel school	3	1	2	5	1	3	3	3	5	3	3	1	5	4	1	3	4	4	4	2	3	3	3	4	3	3	4	3
550	577	midel school	2	1	3	5	1	3	4	4	2	4	2	2	4	4	4	2	3	2	2	2	2	3	2	3	4	2	2	4
551	794	midel school	1	1	3	5	3	3	3	5	3	3	4	3	3	3	3	3	3	3	3	3	4	4	4	4	4	4	4	4
552	882	midel school	1	2	3	5	1	3	1	1	1	4	2	4	3	4	4	3	2	4	2	4	3	3	3	3	3	3	4	3
553	709	midel school	2	2	1	4	2	4	5	5	4	3	3	1	5	1	1	1	5	1	3	1	1	5	5	1	1	1	1	5
554	501	midel school	1	1	2	5	1	4	3	3	4	2	1	1	5	2	1	2	5	2	4	2	3	5	4	1	2	3	2	4
555	514	midel school	2	2	3	6	3	4	3	3	4	1	3	3	3	3	3	3	3	3	3	3	3	3	3	3	3	3	3	3
556	265	midel school	2	2	3	5	1	3	3	3	3	3	3	4	3	3	3	3	3	3	3	3	3	3	3	3	3	3	3	3
557	544	midel school	1	1	2	5	3	3	3	3	5	3	2	1	5	5	4	2	4	4	5	2	4	4	5	5	2	1	4	3
558	808	midel school	1	1	3	5	1	3	3	3	3	4	2	3	3	4	4	2	4	3	2	4	3	3	4	4	4	1	4	4
559	783	midel school	1	2	1	5	1	4	2	3	5	3	2	2	5	4	3	3	4	3	4	1	3	4	5	4	1	3	2	4
560	165	midel school	1	2	4	5	1	3	3	3	3	3	3	3	4	3	4	3	4	3	3	3	4	3	3	4	4	4	3	3
561	342	midel school	3	2	2	5	1	3	3	3	3	3	3	3	2	2	3	2	3	3	4	3	4	2	2	2	4	2	3	3
562	645	midel school	1	1	2	5	1	3	4	3	4	4	2	2	4	2	2	2	4	2	4	2	4	4	4	2	2	4	2	3
563	299	midel school	3	2	2	5	1	3	3	3	5	5	5	4	5	2	5	2	5	1	3	5	1	5	5	5	5	5	5	5
564	340	midel school	1	1	2	5	1	5	4	3	5	3	5	3	5	5	5	5	4	3	5	3	5	5	5	5	5	1	5	5
565	732	midel school	1	2	3	5	1	3	3	4	4	3	4	3	5	5	4	3	4	1	1	1	3	4	5	3	2	5	3	4
566	731	midel school	1	1	3	4	1	2	3	3	3	1	2	1	5	2	2	5	1	2	1	3	1	4	4	2	5	3	5	4
567	296	midel school	2	2	3	5	2	3	1	1	3	3	3	3	3	3	3	3	3	3	3	3	3	3	3	3	3	3	3	3
568	917	midel school	1	1	2	5	1	3	3	3	2	3	3	3	4	3	4	4	3	3	3	3	3	4	3	4	2	3	2	3
569	662	midel school	1	1	1	5	1	4	3	3	4	1	5	4	5	5	2	1	5	4	5	1	2	5	5	2	5	5	3	5
570	493	midel school	2	2	2	5	2	3	2	3	2	5	2	2	2	5	5	4	3	5	5	5	5	5	5	5	5	2	5	5
571	714	midel school	2	1	2	5	1	3	3	4	2	4	2	1	4	4	2	2	2	5	5	1	1	1	3	2	2	1	4	1
572	2135	midel school	1	2	2	5	1	2	1	1	5	5	1	3	4	4	1	2	4	2	2	1	2	4	5	1	1	1	4	4
573	1128	midel school	1	2	1	5	1	5	5	5	1	1	1	1	1	1	1	1	5	1	5	1	1	5	5	5	1	5	5	5
574	1032	midel school	2	1	1	5	3	3	3	4	4	2	3	3	4	4	1	4	3	3	3	1	3	3	4	1	1	1	1	1
575	524	midel school	2	1	2	5	1	3	3	3	4	3	1	3	4	5	4	3	3	4	4	4	3	4	3	2	4	1	3	4
576	358	midel school	3	2	5	4	2	1	5	5	1	1	1	5	1	5	5	5	1	5	1	5	5	1	1	1	5	1	5	1
577	301	midel school	3	1	3	3	3	3	3	3	3	5	3	2	3	3	4	2	2	4	2	4	4	3	2	4	4	2	5	2
578	1179	midel school	2	1	1	5	3	3	2	1	5	1	1	1	5	1	2	1	5	4	3	4	1	4	5	2	1	4	1	4
579	468	midel school	3	1	3	3	3	4	2	3	4	2	2	2	3	4	2	2	2	5	4	4	2	3	4	2	4	3	2	4
580	330	midel school	3	2	2	3	3	3	2	1	4	3	3	2	4	2	4	3	4	4	4	4	3	4	3	3	2	4	2	5
581	396	midel school	3	1	3	2	3	3	3	3	3	4	4	3	4	3	2	4	3	4	4	3	3	4	4	2	4	2	4	4
582	563	midel school	3	1	2	3	2	3	2	3	4	3	2	4	4	4	3	3	4	3	3	4	2	3	4	3	3	3	3	4
583	624	midel school	3	2	4	3	1	3	1	2	5	1	1	1	5	1	4	4	5	1	5	3	3	5	5	5	5	5	5	5
584	351	midel school	3	1	3	3	1	4	3	3	2	3	2	3	4	4	5	3	2	4	4	5	2	4	4	2	4	2	5	4
585	324	midel school	3	1	1	3	1	3	4	4	3	1	1	1	4	3	1	1	4	1	5	1	1	4	4	1	1	3	1	4
586	1341	midel school	3	1	1	5	1	3	3	4	4	2	4	1	5	2	4	5	5	1	2	1	1	5	5	2	1	2	3	4
587	972	midel school	3	1	3	3	3	3	3	4	4	4	4	2	3	3	2	3	3	3	4	2	3	3	3	4	3	3	2	4
588	558	midel school	3	2	2	3	3	4	3	3	5	3	2	1	4	4	3	4	3	2	2	2	3	4	5	2	1	2	3	3
589	506	midel school	3	2	2	3	2	3	3	3	4	2	4	1	4	4	4	4	4	3	2	3	3	4	4	3	2	2	3	3
590	692	midel school	1	1	3	5	3	3	3	3	3	4	3	4	3	5	5	3	3	5	3	3	4	2	3	4	5	1	5	3
591	535	midel school	3	1	1	4	1	3	4	5	4	1	2	2	4	3	2	3	4	5	4	2	4	2	2	2	2	3	2	4
592	760	midel school	3	2	1	3	2	4	5	5	5	1	3	1	5	1	5	2	4	3	4	1	1	5	5	5	1	3	1	5
593	455	midel school	1	1	1	5	1	5	5	5	5	2	3	1	2	2	2	2	2	2	1	3	1	1	1	1	1	1	1	3
594	656	midel school	1	1	1	5	1	4	3	3	5	1	2	1	5	1	1	1	5	3	5	1	1	5	5	1	1	4	2	5
595	505	midel school	3	2	3	3	2	4	4	5	1	1	1	2	5	2	2	5	5	1	3	1	1	5	5	1	2	1	1	4
596	454	midel school	3	1	3	2	3	3	3	2	4	2	1	2	4	3	4	3	3	2	2	2	3	4	3	3	4	4	4	3
597	898	midel school	1	2	3	5	1	3	4	4	5	1	5	1	5	4	4	4	4	4	4	1	1	4	3	4	4	4	3	4
598	417	midel school	1	2	3	5	1	3	3	3	5	2	3	1	3	1	1	1	1	1	5	1	1	5	5	3	1	2	3	2
599	541	midel school	3	2	2	3	3	3	4	3	4	2	2	1	4	4	4	4	3	1	4	2	4	2	4	3	3	2	2	3
600	794	midel school	3	1	2	3	2	3	3	3	4	4	4	4	4	4	4	4	4	4	4	4	4	4	4	4	4	4	4	4
601	521	midel school	3	1	3	5	1	3	3	3	1	5	2	1	2	5	5	5	1	5	5	5	5	5	1	5	5	1	5	5
602	2260	midel school	3	1	3	4	2	3	3	4	3	4	2	4	4	4	4	4	4	5	4	4	4	4	4	2	1	1	4	4
603	418	midel school	2	2	3	5	1	3	3	3	3	3	3	3	3	3	3	3	3	3	3	3	3	3	3	3	3	3	3	3
604	462	midel school	3	1	2	3	3	3	3	4	3	3	2	2	4	3	3	3	2	2	2	2	3	3	3	4	3	3	3	3
605	277	midel school	3	1	3	2	3	3	3	3	2	4	3	3	3	3	4	3	3	5	3	3	3	3	3	4	4	3	4	3
606	820	midel school	2	1	3	5	1	3	3	3	3	4	2	3	4	5	5	1	1	4	1	5	1	5	4	4	3	2	4	4
607	911	midel school	2	2	3	5	1	3	3	3	1	1	3	1	5	5	5	3	5	3	5	1	1	2	4	2	3	4	4	3
608	438	midel school	2	2	3	5	1	3	3	3	5	3	3	3	3	3	3	3	3	3	3	3	3	5	5	2	5	4	4	2
609	303	high school	5	1	3	2	3	3	4	3	1	5	4	4	3	5	5	4	2	4	4	4	4	3	4	4	4	3	4	4
610	341	high school	5	2	2	5	1	3	1	2	5	1	4	2	4	5	2	4	5	1	5	1	2	4	3	1	3	4	4	1
611	510	high school	5	1	3	4	1	2	1	3	5	2	5	4	3	5	3	4	4	5	5	3	3	2	3	1	3	4	5	4
612	389	high school	4	2	3	4	3	3	2	3	3	3	3	2	3	4	5	3	3	4	4	4	4	3	3	2	3	2	4	4
613	598	high school	5	2	3	4	1	4	1	3	2	2	2	3	2	5	5	5	3	3	4	5	5	3	4	4	4	3	4	4
614	545	high school	4	1	2	4	1	3	2	3	4	2	2	3	4	3	4	3	4	4	4	2	4	4	4	2	4	3	2	4
615	409	high school	5	1	3	5	1	3	2	3	5	4	5	4	5	4	4	5	5	2	5	3	3	5	5	3	3	5	3	5
616	380	high school	5	1	3	4	3	3	3	3	2	4	1	4	1	5	5	3	2	5	3	4	2	2	2	4	5	3	4	5
617	304	high school	4	1	2	6	3	4	2	4	5	4	1	4	3	5	1	2	3	5	3	5	3	4	5	3	1	3	1	5
618	266	midel school	2	1	1	1	2	3	3	3	4	4	2	2	3	4	4	3	3	5	4	3	4	4	4	4	4	4	5	4
619	639	high school	5	1	3	4	3	3	3	3	3	4	2	2	4	3	3	3	4	3	4	5	3	4	3	3	2	4	2	1
620	365	high school	4	2	2	2	1	4	1	2	4	2	3	3	2	4	4	4	4	3	3	3	4	3	4	2	2	2	3	3
621	419	high school	4	1	3	2	1	3	3	3	3	3	4	3	4	4	4	4	3	1	4	3	3	4	4	3	4	4	3	4
622	977	high school	5	1	3	6	3	3	3	3	3	2	3	2	3	3	3	3	3	2	2	4	2	3	4	2	3	2	4	4
623	519	high school	4	1	2	4	1	3	1	3	4	2	4	2	4	2	3	3	3	3	3	3	3	3	3	2	2	3	2	3
624	387	high school	5	2	2	2	1	3	3	2	3	2	3	2	5	4	3	3	3	1	3	3	2	4	4	3	1	3	2	4
625	334	high school	4	1	3	2	3	3	2	3	3	3	3	2	2	3	5	4	2	3	2	4	2	3	3	3	4	4	5	3
626	217	midel school	3	1	3	1	2	1	1	1	1	5	1	5	1	5	5	5	5	5	1	5	5	1	1	5	5	5	5	1
627	363	high school	5	1	3	1	1	3	3	3	4	4	1	2	1	3	4	3	3	1	1	3	1	4	5	5	3	4	5	4
628	234	high school	5	2	3	2	1	4	3	3	3	3	3	3	3	3	3	3	3	3	3	3	3	3	3	3	3	3	3	3
629	237	high school	4	2	3	3	1	5	3	3	5	5	5	5	5	5	5	5	5	5	5	5	5	5	5	5	5	5	5	5
630	323	high school	4	2	3	2	1	3	3	3	3	3	3	3	3	3	3	3	3	3	3	3	3	3	3	3	3	3	3	3
631	323	high school	4	2	2	3	1	3	3	2	4	4	1	4	2	5	4	4	4	5	4	3	4	4	4	4	4	3	4	3
632	358	high school	4	2	2	1	1	2	5	5	4	4	4	1	5	2	4	1	5	1	5	1	1	5	5	5	1	1	1	1
633	357	high school	4	2	2	2	1	3	3	3	4	3	3	3	3	3	3	3	3	3	3	3	3	3	3	3	3	3	3	3
634	280	high school	5	2	4	3	1	4	4	4	4	4	4	4	4	4	4	4	4	4	4	4	4	4	4	4	4	4	4	4
635	371	high school	4	1	3	3	3	3	1	3	4	4	2	2	4	5	4	3	4	4	4	3	2	3	4	3	3	3	3	4
636	366	high school	4	2	3	6	3	3	3	3	3	3	3	3	3	3	3	3	3	3	3	3	3	3	3	3	3	3	3	3
637	317	high school	4	2	3	1	1	3	3	3	1	5	1	1	1	5	5	1	1	5	4	3	3	1	3	5	5	3	5	3
638	373	high school	4	1	3	1	1	3	2	3	2	5	1	1	3	5	5	3	2	3	3	2	2	4	5	3	2	4	4	3
639	384	high school	4	2	2	3	1	3	4	4	4	3	3	3	3	3	3	3	3	3	3	3	3	3	3	3	3	3	3	3
640	400	high school	4	2	2	3	1	3	3	3	3	4	2	3	3	4	4	3	3	3	4	3	3	3	3	4	3	3	4	3
641	273	high school	5	2	2	3	3	3	3	3	4	4	4	4	4	4	4	4	3	4	4	4	4	4	4	4	4	4	4	4
642	399	high school	4	2	2	3	3	3	5	5	4	4	4	4	4	4	4	4	4	4	4	4	4	4	4	4	4	4	4	4
643	466	high school	4	1	3	3	3	3	3	3	3	4	3	3	3	4	4	3	3	4	3	3	4	3	3	4	4	3	4	3
644	445	high school	5	1	2	1	3	3	2	2	4	2	3	1	4	4	5	3	4	4	3	4	4	3	4	4	3	3	2	3
645	487	midel school	1	2	3	6	3	3	3	3	4	2	4	2	4	2	4	2	2	2	4	2	2	4	4	2	2	4	2	4
646	513	high school	4	1	1	3	1	3	3	3	4	2	2	1	4	2	2	2	3	2	3	2	2	4	4	2	2	2	2	4
647	501	high school	4	1	2	2	1	3	3	3	4	4	2	2	4	4	4	3	4	4	4	2	4	4	4	2	2	3	4	5
648	472	high school	4	1	1	3	1	3	3	3	5	1	3	2	4	4	2	2	4	4	4	3	4	3	5	2	3	2	2	4
649	487	high school	4	2	3	3	1	3	3	3	3	3	3	1	3	3	3	3	3	3	3	3	3	3	3	3	3	3	3	3
650	560	high school	5	1	2	3	1	3	2	2	5	4	2	1	5	3	4	3	4	4	4	2	2	4	3	4	2	5	4	5
651	459	high school	4	1	2	6	1	3	2	2	4	4	3	1	3	4	4	3	3	3	4	3	4	4	4	3	3	3	4	3
652	495	high school	4	1	3	3	1	3	2	3	2	4	2	3	2	4	4	4	2	4	3	2	3	3	3	4	4	2	3	3
653	138	high school	6	1	3	2	1	3	3	3	3	3	3	3	3	3	3	3	3	3	3	3	3	3	3	3	3	3	3	3
654	517	high school	4	2	3	3	3	3	3	3	3	3	3	2	3	3	3	3	3	3	3	3	3	3	3	3	3	3	3	3
655	425	high school	4	1	2	1	1	3	2	3	4	4	2	3	3	4	4	3	4	3	3	3	2	3	3	3	3	3	3	4
656	120	high school	6	2	3	3	1	3	3	3	3	3	3	3	3	3	3	3	3	3	3	3	3	3	3	3	3	3	3	3
657	565	high school	4	2	1	3	3	3	3	3	5	2	4	2	5	2	4	2	3	1	2	4	2	4	5	3	4	5	2	4
658	131	high school	6	1	4	1	3	4	4	4	4	4	4	4	4	4	4	4	4	4	4	4	4	4	4	4	4	4	4	4
659	538	high school	4	1	3	6	3	3	3	3	3	3	2	3	3	3	3	3	3	3	3	3	3	3	3	3	3	3	3	3
660	573	high school	4	1	2	3	1	3	3	3	2	3	1	3	2	3	2	2	3	3	3	3	3	3	3	3	3	3	3	3
661	194	high school	6	2	2	3	1	3	3	3	4	3	3	3	3	3	3	3	3	3	3	3	3	3	3	3	3	3	3	3
662	187	high school	6	1	3	3	1	3	4	3	3	3	3	3	3	3	3	3	3	3	3	3	3	3	3	3	3	3	3	3
663	213	high school	6	1	3	3	1	3	3	3	3	3	3	3	3	3	3	3	3	3	3	3	3	3	3	3	3	3	3	3
664	647	high school	5	1	3	3	1	3	2	3	2	3	1	3	3	4	4	3	2	4	4	4	4	3	4	2	3	2	4	4
665	275	high school	6	2	3	3	3	4	3	3	3	3	3	3	3	3	3	3	3	3	3	3	3	3	3	3	3	3	3	3
666	247	high school	6	2	3	3	1	3	3	3	4	1	3	3	3	3	3	3	3	3	3	3	3	3	3	3	3	3	5	4
667	250	high school	6	1	2	1	3	3	4	4	3	3	3	3	3	3	3	3	3	3	3	3	3	3	3	3	3	3	3	3
668	252	high school	6	1	3	3	1	3	4	4	4	4	2	2	4	2	2	2	3	3	3	3	3	3	3	3	3	3	3	3
669	548	high school	4	1	2	6	3	3	3	3	2	2	2	1	4	4	2	3	4	4	2	2	2	4	4	2	2	2	4	4
670	206	high school	6	1	3	3	1	3	3	3	4	3	3	3	3	3	3	3	3	3	3	3	3	3	3	3	3	3	3	3
671	245	high school	6	2	3	1	1	3	3	3	3	3	3	3	3	3	3	3	3	3	3	3	3	3	3	3	3	3	3	3
672	547	high school	5	1	3	3	3	3	1	1	1	5	1	1	1	5	5	5	1	5	5	4	3	1	1	5	4	3	4	3
673	255	high school	6	2	1	3	3	5	5	5	5	5	5	1	5	1	1	1	1	1	1	1	1	1	1	1	1	5	1	1
674	671	high school	4	1	3	3	3	3	1	3	4	2	2	2	4	2	3	3	4	2	2	2	3	2	4	1	2	2	3	3
675	296	high school	6	2	1	3	3	5	5	5	5	1	5	1	1	1	1	1	1	1	1	1	1	1	1	1	1	1	1	1
676	276	high school	6	2	3	3	1	3	4	4	4	3	3	3	3	3	3	3	3	3	3	3	3	3	3	3	3	3	3	3
677	184	high school	6	1	3	3	1	4	2	2	4	3	3	3	3	3	2	3	3	3	3	3	3	3	3	3	3	3	3	3
678	270	high school	6	2	3	3	3	3	3	3	3	3	3	3	3	3	3	3	3	3	3	3	3	3	3	3	3	3	3	3
679	243	high school	6	2	1	3	3	3	5	5	5	1	1	1	5	1	1	1	1	1	1	1	1	1	1	1	1	1	1	1
680	254	high school	6	1	3	3	3	3	3	3	3	3	3	3	3	3	3	3	3	3	3	3	3	3	3	3	3	3	3	3
681	286	high school	6	1	3	1	3	3	3	3	3	3	3	3	3	3	3	3	3	3	3	3	3	3	3	3	3	3	3	3
682	374	high school	6	1	3	3	1	3	4	3	3	3	3	3	3	3	3	3	3	3	3	3	3	3	3	3	3	3	3	3
683	219	high school	6	2	2	1	1	3	5	5	4	2	3	3	3	3	3	3	4	4	4	4	3	3	3	3	4	3	3	3
684	349	high school	6	2	1	3	2	5	5	5	5	5	5	5	5	5	5	5	5	5	5	5	5	5	5	5	5	5	3	5
685	347	high school	6	2	3	3	3	3	4	4	3	3	3	4	3	3	3	3	3	3	3	3	3	3	3	3	3	3	3	3
686	363	high school	6	2	4	3	2	4	5	5	1	1	1	1	1	1	5	2	4	2	2	4	2	4	2	2	4	2	1	1
687	165	high school	6	1	3	2	1	3	3	3	4	3	3	3	4	3	3	3	3	3	3	3	3	3	3	3	3	3	3	4
688	373	high school	6	1	2	3	1	3	3	4	4	2	3	3	4	3	3	3	3	2	3	2	2	4	3	3	2	3	3	3
689	303	high school	4	1	2	3	3	3	4	4	5	2	2	2	5	5	2	2	2	2	2	2	2	2	2	2	2	2	2	2
690	310	high school	6	1	2	3	3	3	3	4	4	2	2	2	4	2	2	2	4	2	4	2	4	4	4	2	2	2	4	4
691	378	high school	4	2	1	3	1	4	4	4	5	1	5	1	5	4	5	1	2	5	5	1	1	5	5	5	3	5	3	5
692	186	high school	5	2	3	3	3	3	3	3	3	3	3	3	3	3	3	3	3	3	3	3	3	3	3	3	3	3	3	3
693	423	high school	6	1	3	3	1	3	3	3	4	3	3	3	4	4	4	3	3	3	4	4	4	3	4	2	2	4	4	4
694	408	high school	6	2	2	3	1	3	2	3	4	2	4	4	4	4	4	4	4	4	4	2	4	4	4	4	2	4	4	4
695	565	high school	4	1	2	3	3	3	3	3	4	3	3	3	3	3	3	3	3	3	3	3	3	3	3	3	3	3	3	3
696	418	high school	6	2	3	3	1	3	2	3	4	2	3	2	4	4	3	3	4	1	4	3	3	3	3	3	3	3	3	3
697	418	high school	6	1	1	3	1	3	3	3	5	1	1	1	5	1	1	1	5	1	5	1	1	1	5	1	1	1	1	4
698	590	high school	6	1	2	3	1	3	3	3	4	2	2	1	4	4	4	2	4	4	4	4	2	4	4	2	2	2	4	4
699	487	high school	6	1	2	1	1	3	5	5	3	1	1	1	5	1	1	1	5	1	5	1	1	5	5	1	1	3	1	5
700	667	high school	5	2	1	6	3	3	3	3	4	3	4	2	4	2	2	2	4	2	4	2	2	5	5	4	4	4	4	4
701	1015	high school	6	1	3	3	1	3	3	3	3	4	2	3	4	4	2	2	3	4	3	4	2	3	4	2	5	1	4	4
702	647	high school	5	1	3	3	3	3	1	1	4	4	3	3	3	3	3	3	3	3	3	3	3	3	3	3	3	3	3	3
703	417	high school	5	1	3	3	1	3	1	1	3	4	1	1	4	4	4	4	4	4	5	4	5	1	1	4	3	1	1	3
704	84	high school	4	2	3	3	1	3	1	1	3	3	3	3	3	3	3	3	3	3	3	3	3	3	3	3	3	3	3	3
705	405	high school	5	1	3	1	1	3	3	3	3	3	3	3	3	3	3	3	3	3	3	3	3	3	3	3	3	3	3	3
706	442	high school	5	1	1	1	1	2	3	3	2	5	2	3	3	3	3	3	3	3	3	3	3	3	3	3	3	3	3	3
707	521	high school	5	1	2	3	1	3	1	1	2	4	2	3	4	4	3	3	4	4	4	5	4	3	2	2	3	2	5	3
708	405	high school	5	1	2	3	3	4	4	4	3	4	3	2	3	4	3	3	3	4	3	2	3	3	4	3	4	3	3	4
709	580	high school	5	1	1	3	3	3	5	5	2	4	2	1	3	4	4	3	3	4	4	3	2	2	2	4	3	2	3	4
710	241	high school	4	2	3	1	3	3	3	3	5	1	4	1	5	2	2	2	5	2	4	2	1	5	5	2	2	5	2	4
711	375	high school	4	1	3	3	3	3	3	3	3	4	3	2	3	5	5	3	3	5	3	3	5	5	2	5	4	2	3	3
712	219	high school	5	1	2	1	1	3	3	3	3	3	3	3	3	3	3	3	3	3	3	3	3	3	3	3	3	3	3	3
713	283	high school	5	1	2	1	1	3	4	3	4	2	2	3	4	4	2	4	4	2	4	4	4	4	4	2	2	4	2	4
714	338	high school	5	1	2	1	1	3	3	3	3	3	3	3	3	3	3	3	3	3	3	3	3	3	3	3	3	3	3	3
715	622	high school	5	2	2	3	1	3	3	3	3	4	2	4	4	4	4	2	4	5	2	2	4	2	4	4	3	4	5	4
716	457	high school	5	1	1	3	1	3	3	3	5	1	4	1	4	4	4	4	4	4	4	4	4	4	4	2	3	4	5	4
717	1490	high school	5	1	2	3	3	3	3	3	2	4	2	3	1	4	4	3	2	3	4	2	4	3	4	2	4	1	4	4
718	751	high school	5	1	1	3	1	5	4	4	5	1	1	1	5	2	2	2	5	4	4	1	1	5	5	1	1	4	1	5
719	338	high school	5	1	3	1	3	3	3	3	3	3	3	3	3	3	3	3	3	3	3	3	3	3	3	3	3	3	3	3
720	553	high school	5	1	3	3	1	1	3	3	3	3	3	3	3	3	3	3	3	3	3	3	3	3	3	3	3	3	3	3
721	442	high school	5	1	3	1	1	4	4	4	4	2	2	2	4	2	2	1	2	2	2	4	2	2	2	2	2	4	2	2
722	368	high school	5	2	1	3	1	3	2	3	5	5	5	1	5	3	3	5	5	3	5	2	3	4	4	1	1	4	3	5
723	365	high school	5	2	2	3	1	3	4	4	2	4	2	1	2	4	2	4	2	4	2	2	4	2	4	3	2	4	4	4
724	313	high school	5	2	3	1	1	3	4	4	5	2	2	2	3	3	3	3	3	3	3	3	3	3	3	3	3	3	3	3
725	391	high school	5	1	2	1	3	3	4	4	3	3	2	1	4	4	3	2	4	3	3	2	4	4	4	3	2	3	4	3
726	384	high school	5	1	3	1	1	3	3	3	3	4	3	3	3	3	3	3	3	3	3	3	3	3	3	3	3	3	3	3
727	344	high school	4	1	2	2	3	3	3	3	4	4	4	3	4	3	4	3	4	3	4	3	3	4	4	3	4	4	4	4
728	162	high school	4	1	3	4	1	2	3	3	4	3	3	3	4	4	4	4	3	3	3	4	3	4	3	3	4	3	3	3
729	413	high school	4	1	3	6	3	3	3	3	5	1	4	1	5	2	4	3	5	5	5	1	2	5	5	1	2	3	3	5
730	431	high school	4	1	2	6	1	3	3	3	3	3	3	3	3	4	3	3	4	2	3	3	3	3	4	3	3	3	4	4
731	333	high school	4	1	3	3	2	3	3	3	4	3	4	2	2	3	3	2	3	4	2	4	1	3	1	3	2	4	3	1
732	476	high school	4	2	3	2	3	3	3	3	4	3	3	2	2	4	4	2	2	4	4	2	3	4	4	3	4	3	3	2
733	241	high school	4	1	4	1	1	4	5	5	4	5	5	5	5	1	1	1	4	4	4	4	4	4	4	4	4	4	4	4
734	386	high school	5	1	1	3	1	3	4	4	5	1	1	1	5	4	2	1	5	3	3	2	2	5	5	1	1	1	3	4
735	556	high school	4	1	1	1	1	3	5	5	1	5	3	1	4	4	5	1	1	4	1	1	1	1	5	5	2	2	5	1
736	363	high school	5	1	2	3	1	3	1	2	2	4	1	3	4	4	4	3	2	5	2	4	3	4	3	4	3	2	2	3
737	336	high school	4	1	3	3	1	3	3	3	4	2	1	3	2	3	4	3	2	3	3	4	3	3	3	4	4	2	4	2
738	241	high school	4	1	2	1	3	3	3	3	4	3	3	3	4	4	4	4	4	4	4	4	4	4	4	3	4	4	4	4
739	508	high school	4	1	2	3	1	3	3	4	2	3	1	1	2	5	4	2	3	4	4	4	2	3	3	3	4	1	3	3
740	340	high school	4	2	1	1	1	3	2	3	3	4	3	1	3	4	4	3	3	3	2	3	3	2	3	3	4	1	4	3
741	623	high school	4	1	2	3	1	3	3	3	4	2	5	3	5	4	3	3	3	3	3	3	3	3	3	3	3	3	3	3
742	934	high school	4	1	4	3	1	3	3	3	2	2	2	3	2	4	5	3	3	2	3	3	3	4	4	4	4	3	4	5
743	331	high school	4	2	4	1	1	3	2	3	3	3	3	3	3	3	3	3	3	3	3	3	2	4	2	3	4	2	3	2
744	296	high school	4	2	3	2	1	3	5	5	2	2	2	2	2	2	2	2	2	1	2	4	2	2	4	2	2	2	4	2
745	1380	high school	4	2	5	1	1	1	1	1	1	5	1	5	1	5	5	5	1	5	1	5	5	1	1	5	5	1	5	1
746	323	high school	4	2	3	6	3	3	3	3	3	3	3	3	3	3	3	3	3	3	3	3	3	3	3	3	3	3	3	3
747	498	high school	5	1	1	6	3	3	2	1	3	3	1	4	3	4	3	3	3	4	3	4	4	3	2	3	5	2	3	3
748	212	high school	4	2	1	6	3	4	3	3	3	3	3	3	3	3	3	2	2	2	2	2	2	2	2	2	2	2	2	2
749	265	high school	5	2	3	2	3	3	3	3	2	3	2	2	3	4	2	2	2	3	3	2	3	2	2	3	3	2	4	3
750	507	high school	4	1	3	6	1	3	3	4	1	5	4	1	3	5	5	1	1	3	1	3	1	1	3	5	2	3	5	1
751	216	high school	4	2	3	6	1	3	5	5	3	3	3	3	3	3	3	3	3	3	3	3	3	3	3	3	3	3	3	3
752	554	high school	4	1	1	1	1	3	4	4	5	1	4	2	5	4	2	2	4	4	4	1	3	4	5	2	2	4	4	4
753	1003	high school	5	1	2	3	1	3	4	4	4	2	3	2	4	4	2	4	4	4	3	3	3	4	5	2	2	4	3	3
754	209	high school	4	2	3	3	3	3	3	3	5	1	3	3	3	3	3	3	3	3	3	3	3	3	3	3	3	3	3	3
755	408	high school	6	1	2	6	1	3	3	3	3	3	2	2	4	3	3	3	2	2	3	2	2	3	4	3	3	3	2	4
756	154	high school	4	2	3	3	1	3	3	3	3	3	3	3	3	3	3	3	3	3	3	3	3	3	3	3	3	3	3	3
757	1788	high school	4	1	2	3	3	3	3	3	2	2	3	3	4	2	2	2	4	2	4	2	2	4	4	2	3	3	3	4
758	426	high school	4	1	2	3	1	3	4	4	4	3	3	2	4	4	2	3	4	2	2	2	2	3	4	2	2	3	2	4
759	109	high school	4	2	3	3	3	3	3	3	3	3	3	3	3	3	3	3	3	3	3	3	3	3	3	3	3	3	3	3
760	1172	high school	4	1	2	3	1	2	3	3	4	4	4	2	4	3	4	4	3	2	2	3	4	4	4	3	3	2	3	4
761	203	high school	4	2	2	3	3	3	3	3	2	2	2	2	2	2	2	2	2	2	2	2	2	2	2	2	2	2	2	2
762	271	high school	4	2	2	6	3	3	3	3	5	1	1	1	5	1	5	5	5	5	5	5	1	5	5	1	1	5	4	5
763	448	high school	4	2	3	6	3	3	3	3	1	5	1	5	1	5	5	5	1	5	3	5	5	1	4	5	5	1	5	1
764	5812	high school	4	2	1	3	1	3	4	3	3	3	4	2	4	3	4	3	3	3	4	4	4	3	4	4	4	3	4	3
765	996	high school	5	1	1	3	1	2	1	3	2	4	1	1	3	4	5	1	1	5	5	2	3	1	1	4	2	5	5	3
766	335	high school	5	1	4	6	3	3	1	1	3	3	3	3	3	3	3	3	3	3	3	3	3	1	1	4	4	5	1	3
767	536	high school	5	1	2	3	1	3	5	5	5	1	5	1	5	1	3	4	3	1	4	2	3	3	3	3	3	3	3	3
768	609	high school	5	1	3	3	3	2	2	2	3	3	3	3	3	3	3	3	3	3	4	3	3	3	3	3	3	3	3	3
769	549	high school	5	1	1	1	1	4	4	4	4	3	3	2	4	4	4	3	4	4	4	1	2	4	4	3	2	4	3	4
770	743	high school	5	1	2	3	3	3	2	2	4	2	3	2	3	4	3	3	4	2	3	3	3	3	4	2	4	3	2	3
771	384	high school	5	2	1	3	1	3	3	3	5	1	2	1	4	3	2	3	4	1	4	2	2	5	3	3	2	1	1	4
772	597	high school	5	1	3	3	1	4	4	4	4	3	2	2	4	3	4	4	4	4	3	3	2	4	4	2	4	3	4	4
773	812	high school	4	1	3	6	3	3	4	4	2	3	3	2	4	3	4	3	4	4	4	1	2	3	3	2	3	2	4	4
774	354	high school	5	2	3	6	2	3	4	4	1	5	2	1	2	5	5	1	1	1	1	5	2	5	5	5	5	4	5	5
775	248	high school	4	2	3	3	3	3	3	3	3	3	3	3	3	3	4	4	4	3	3	3	3	3	3	3	3	3	3	3
776	431	high school	4	2	2	3	2	3	3	3	4	3	3	3	4	4	2	4	3	3	3	4	4	2	3	3	3	3	3	3
777	342	high school	4	2	3	3	1	2	3	3	3	3	3	3	2	3	3	3	3	2	3	3	3	3	3	4	4	4	5	4
778	497	high school	4	1	2	3	1	3	4	4	4	1	1	1	5	2	1	1	4	1	4	4	2	4	4	2	1	4	4	2
779	427	high school	4	1	3	3	1	2	3	3	4	3	2	3	4	4	4	3	2	2	3	3	4	2	4	4	3	4	4	2
780	384	high school	4	1	2	3	1	3	4	4	4	1	2	1	4	2	1	2	4	2	4	4	1	4	4	1	1	4	1	2
781	855	high school	4	2	3	3	1	3	2	3	5	1	4	1	5	2	1	1	3	2	5	1	1	4	5	1	2	4	1	4
782	784	high school	5	1	3	1	3	3	4	4	2	2	3	4	2	4	5	2	2	5	4	4	3	2	2	2	2	4	4	3
783	873	high school	5	1	3	3	1	4	2	3	4	2	2	2	5	2	2	4	3	2	4	2	2	4	4	2	4	4	4	4
784	208	high school	6	2	3	6	3	3	2	3	4	3	2	4	3	1	2	2	4	2	3	3	3	2	4	2	3	4	3	2
785	458	high school	5	2	3	3	3	3	1	1	4	4	3	2	4	4	4	4	4	2	4	5	2	4	5	3	4	5	3	4
786	412	high school	5	2	2	4	1	3	3	3	2	4	1	2	3	4	2	3	4	2	4	3	2	4	4	2	2	2	3	4
787	309	high school	4	2	3	3	3	4	3	3	4	4	4	2	4	2	4	4	3	2	3	2	4	4	4	4	4	4	4	4
788	212	high school	4	2	3	3	3	3	5	3	3	3	3	3	3	3	3	3	3	3	3	3	3	2	2	2	2	2	2	2
789	312	high school	4	1	3	2	3	3	3	3	3	3	3	3	3	3	3	3	3	3	3	3	3	3	3	3	3	3	3	3
790	454	high school	4	1	3	2	1	3	3	3	3	3	3	3	3	3	3	3	3	3	3	3	3	3	3	3	3	3	3	3
791	349	high school	5	1	2	1	1	3	3	3	3	3	2	3	3	4	4	3	2	4	3	2	3	2	4	3	3	2	2	2
792	363	high school	6	1	2	1	1	3	3	3	1	2	1	3	2	4	5	3	1	5	3	2	5	2	1	5	4	2	4	4
793	611	high school	5	1	3	4	1	3	2	3	2	5	2	3	3	5	5	4	2	5	3	3	5	2	3	5	5	4	4	2
794	157	college	7	1	2	3	1	4	4	4	4	4	4	4	4	4	4	4	4	4	4	4	4	4	4	4	4	4	4	4
795	253	college	9	1	1	3	1	5	3	3	3	4	3	2	4	2	3	4	4	5	5	4	4	3	3	5	4	3	5	3
796	372	college	8	1	2	4	1	3	4	4	2	2	3	3	4	4	4	4	4	4	3	2	2	4	2	3	4	2	2	4
797	636	college	8	2	2	3	1	3	3	3	4	4	1	3	3	4	4	4	2	2	4	4	4	4	4	4	3	4	4	3
798	477	college	7	2	1	3	1	3	3	3	3	3	2	2	4	3	4	4	3	2	3	4	3	3	4	2	2	4	3	4
799	208	college	8	1	2	3	1	3	4	4	4	4	2	2	4	3	2	4	4	2	4	4	3	4	4	3	3	4	2	3
800	209	college	7	1	2	4	1	3	3	3	3	3	3	2	4	2	2	2	3	1	3	4	4	3	2	2	2	3	4	3
801	242	college	7	2	3	1	1	3	3	3	3	3	3	4	2	5	4	3	2	4	2	4	5	3	2	3	4	3	3	3
802	284	college	8	1	3	4	1	3	1	1	4	3	3	2	4	4	4	3	2	1	3	3	1	4	4	4	3	4	4	4
803	437	college	8	1	2	4	1	3	3	3	4	3	3	1	4	1	3	2	3	2	2	2	2	3	4	2	1	3	4	4
804	262	college	7	2	3	3	1	3	3	3	2	4	2	4	2	4	4	4	2	3	4	4	4	2	2	2	2	4	4	1
805	268	college	7	2	2	4	2	3	3	3	4	4	3	2	2	3	1	4	4	3	2	4	4	3	3	3	4	4	5	4
806	304	college	7	2	1	4	3	5	4	4	5	5	5	2	5	2	2	5	5	2	5	2	2	5	5	2	2	5	4	5
807	142	college	7	1	3	3	1	3	3	3	4	3	3	3	3	3	3	3	3	3	3	3	3	3	3	3	3	3	3	3
808	275	college	7	1	4	3	1	3	4	4	4	4	3	3	1	4	3	4	2	2	4	2	4	4	4	4	4	2	4	4
809	324	college	7	2	2	3	1	3	3	3	4	4	3	1	4	2	4	4	4	4	3	2	2	4	4	2	2	4	4	4
810	341	college	7	2	2	3	1	4	3	4	4	1	3	1	4	3	2	2	2	1	4	2	2	2	4	2	3	2	2	3
811	334	college	7	2	1	4	1	4	3	4	5	4	3	1	5	2	2	2	5	2	5	1	1	4	5	1	4	4	4	5
812	282	college	7	1	2	3	1	3	3	3	2	3	5	1	4	4	1	4	4	1	5	1	1	3	4	1	2	4	5	5
813	362	college	7	1	2	3	1	5	3	3	4	4	3	3	5	4	2	3	4	4	4	3	4	4	3	3	2	4	3	4
814	369	college	7	1	3	3	1	3	2	2	2	4	3	3	4	4	4	4	4	3	4	4	4	4	4	4	4	3	2	4
815	355	college	7	1	3	4	3	3	3	4	3	3	3	3	3	3	3	3	3	3	3	3	3	3	3	3	3	3	3	3
816	368	college	7	2	2	4	1	3	3	3	4	4	4	2	4	4	4	4	4	4	4	4	2	4	4	3	3	3	4	3
817	383	college	7	2	3	3	1	3	1	1	4	4	2	2	4	4	4	4	4	2	4	2	2	4	4	4	4	2	4	2
818	378	college	7	1	2	3	1	3	3	3	2	4	2	2	3	4	5	2	3	4	4	4	2	4	4	3	4	4	4	4
819	395	college	7	2	2	5	1	4	3	3	4	2	3	2	4	5	2	4	3	4	5	3	5	2	5	4	4	3	3	4
820	382	college	7	2	1	6	1	3	2	3	4	4	1	1	5	5	4	5	5	1	5	2	3	5	1	1	2	4	1	5
821	316	college	7	2	2	3	1	3	4	4	4	2	2	2	4	4	4	4	3	2	2	2	2	4	4	4	4	4	4	4
822	405	college	7	2	1	3	2	3	4	4	4	2	2	2	4	4	5	4	2	4	4	4	4	2	4	2	2	4	4	3
823	411	college	7	1	1	5	1	3	4	4	5	2	2	2	5	3	2	3	5	3	4	2	2	4	4	1	2	2	1	5
824	420	college	7	1	2	4	2	3	5	5	4	4	4	3	3	3	4	4	4	4	4	4	4	4	4	4	4	4	4	4
825	425	college	7	2	3	3	1	3	1	1	3	3	3	3	3	3	3	3	3	3	3	3	3	3	3	3	3	3	3	3
826	424	college	7	1	2	3	1	3	4	4	4	3	3	2	3	4	4	2	4	4	4	2	4	4	4	2	2	2	3	3
827	426	college	7	1	2	2	3	3	3	3	3	3	3	3	3	4	5	4	2	4	4	3	4	3	3	4	4	4	4	3
828	386	college	7	2	1	4	3	4	3	4	5	2	4	1	4	4	4	4	4	1	4	2	2	4	4	2	1	5	4	3
829	431	college	7	1	3	4	1	3	3	3	4	4	4	3	5	4	5	3	2	2	3	4	5	2	4	3	2	5	5	5
830	434	college	7	2	4	4	2	3	3	3	3	2	4	2	4	2	4	2	3	3	4	4	3	2	4	3	3	4	4	3
831	359	college	7	2	2	4	1	3	3	3	4	4	2	2	4	2	2	4	3	4	4	2	2	3	2	2	2	2	2	3
832	460	college	7	1	2	3	2	3	4	4	3	2	2	1	4	4	2	4	4	4	4	2	2	4	2	1	1	4	4	4
833	428	college	7	2	2	4	1	3	3	3	5	2	2	2	5	2	4	1	4	2	2	4	2	4	3	2	4	4	4	4
834	470	college	7	1	2	3	1	3	4	4	2	3	1	1	4	4	4	4	2	5	4	1	4	2	5	5	2	5	5	3
835	483	college	7	2	5	3	1	4	4	3	4	2	4	2	4	5	4	4	4	1	4	5	1	4	4	4	1	4	5	2
836	441	college	7	2	1	4	1	3	3	4	2	3	2	1	3	2	4	4	3	1	4	3	4	2	4	2	2	2	4	4
837	438	college	7	1	2	2	2	3	3	3	4	3	2	2	3	3	3	4	3	2	3	3	3	3	3	2	3	2	4	4
838	517	college	7	2	2	3	1	3	2	1	4	2	3	1	5	4	4	4	4	3	4	2	2	4	4	2	2	4	3	5
839	424	college	7	2	2	4	3	3	4	4	5	1	3	1	5	1	4	3	4	1	5	1	1	5	5	1	1	5	4	4
840	556	college	7	2	2	3	2	3	2	2	4	1	2	1	2	4	5	1	2	1	4	5	4	3	5	1	2	4	4	1
841	462	college	7	2	2	3	1	3	2	3	2	3	1	1	1	5	5	1	1	5	3	1	1	1	4	2	2	1	4	1
842	591	college	7	1	2	5	1	3	2	2	3	3	3	2	4	3	3	3	4	4	4	4	4	4	4	3	4	4	4	4
843	533	college	7	2	1	4	1	3	5	5	4	2	1	1	4	4	4	3	3	2	3	1	4	2	4	4	3	1	2	2
844	459	college	7	2	1	4	1	3	4	4	5	2	3	4	5	5	5	5	5	2	4	3	3	4	5	3	5	4	3	5
845	419	college	7	2	2	3	1	3	4	5	4	3	2	2	5	4	4	3	4	4	4	2	4	5	4	4	3	5	5	4
846	657	college	7	2	2	4	2	3	3	4	4	2	3	2	4	3	2	3	4	2	4	2	2	4	4	2	2	4	2	2
847	392	college	7	1	3	6	1	3	3	3	4	4	4	4	4	4	4	4	4	4	4	4	4	4	4	4	4	3	4	3
848	500	college	7	2	2	3	1	4	3	4	5	2	4	2	5	2	2	4	5	2	5	5	1	4	5	4	1	5	5	5
849	689	college	7	2	2	3	1	3	3	3	5	2	3	1	4	2	3	4	4	1	4	4	2	4	4	2	3	2	4	4
850	785	college	7	1	1	4	1	3	4	4	4	4	1	1	5	3	4	5	4	4	4	2	3	2	4	2	2	2	4	2
851	1429	college	7	1	1	3	1	4	5	5	4	2	3	3	4	3	3	4	4	2	4	2	2	4	5	2	2	3	1	3
852	127	college	7	1	3	4	1	4	4	4	4	4	4	4	4	4	4	4	4	4	4	4	4	4	4	4	4	4	4	4
853	223	college	7	2	5	3	1	3	3	2	2	4	2	4	4	2	2	4	4	2	2	4	4	2	2	4	4	2	2	4
854	96	college	7	1	5	1	1	5	5	5	5	5	5	5	5	5	5	5	5	5	5	5	5	5	5	5	5	5	5	5
855	247	college	7	1	3	3	1	3	2	2	3	4	3	4	4	4	4	2	3	4	2	3	4	2	1	4	3	4	3	3
856	241	college	7	1	3	5	1	3	3	3	2	4	2	3	4	4	4	4	3	4	3	4	3	4	4	4	3	3	2	4
857	289	college	7	2	2	3	1	4	3	3	5	5	4	2	4	3	4	4	4	2	4	4	4	4	4	2	4	3	4	4
858	284	college	7	2	4	5	1	3	3	3	3	3	3	3	3	3	3	3	3	3	3	3	3	3	3	3	3	3	3	3
859	297	college	7	2	3	5	1	4	3	3	3	3	3	3	3	3	3	3	3	3	3	3	3	3	3	3	3	3	3	3
860	132	college	7	2	3	1	3	4	5	5	3	3	3	3	3	3	3	3	3	3	3	3	3	3	3	3	3	3	3	3
861	188	college	7	1	3	6	3	4	3	3	4	4	4	4	5	5	5	5	4	4	4	5	3	4	3	4	3	4	3	4
862	335	college	7	2	2	4	1	3	3	3	4	4	2	1	4	4	4	4	4	2	4	2	4	3	4	4	3	4	4	4
863	328	college	7	1	3	3	1	3	1	2	4	4	4	4	4	4	4	4	4	4	4	3	3	4	4	4	3	4	5	3
864	338	college	7	1	3	3	1	3	3	4	3	3	3	4	3	3	3	3	3	3	3	3	3	3	3	3	3	3	3	3
865	372	college	7	1	1	3	1	4	4	4	4	2	2	1	4	4	3	4	4	4	4	2	2	4	4	2	2	4	4	4
866	361	college	7	2	3	3	1	3	3	3	3	3	2	4	4	4	4	4	3	1	4	2	3	3	4	2	3	2	3	4
867	381	college	7	2	2	5	2	3	4	4	4	3	3	3	4	3	3	3	4	3	4	3	2	4	4	2	3	4	2	3
868	375	college	7	1	2	3	1	3	3	4	4	3	2	2	4	3	4	4	3	3	4	3	3	3	3	3	3	3	2	4
869	371	college	7	1	2	3	1	3	4	4	4	2	2	2	4	4	4	4	4	4	4	4	4	4	4	3	3	4	4	4
870	396	college	7	2	1	4	1	4	4	4	5	1	1	1	5	3	1	1	5	1	5	1	1	1	5	1	1	1	1	5
871	400	college	7	1	1	3	1	3	3	3	4	3	4	2	3	4	4	3	3	2	4	4	3	4	4	2	4	4	4	3
872	403	college	7	2	3	3	1	3	2	3	4	3	2	3	4	4	5	4	3	2	3	4	2	4	3	3	4	3	4	3
873	416	college	7	2	2	2	1	4	4	4	4	2	2	3	4	4	4	4	5	1	3	2	2	4	5	1	1	3	4	4
874	446	college	7	1	3	3	1	3	2	3	2	5	1	2	2	5	5	2	2	5	2	4	4	1	2	5	4	1	5	2
875	390	college	7	1	1	3	1	3	4	4	5	2	1	2	5	2	3	3	2	2	3	3	3	3	3	3	3	5	3	3
876	299	college	7	1	3	2	3	5	5	5	5	5	4	2	4	3	3	3	3	3	3	3	3	3	3	3	3	3	3	3
877	510	college	7	2	3	3	1	3	3	4	2	2	1	1	3	4	4	3	2	4	4	4	4	4	4	2	4	3	4	3
878	373	college	7	1	4	3	1	4	4	4	2	4	2	4	3	4	4	2	3	4	4	4	4	2	2	4	4	2	4	4
879	490	college	7	1	2	3	1	3	2	1	4	2	3	2	4	4	3	3	4	4	4	4	4	4	4	2	2	4	4	3
880	455	college	7	2	3	3	1	2	1	1	1	5	1	4	1	5	5	1	1	5	1	5	5	1	1	5	5	1	5	1
881	539	college	7	1	2	3	1	4	1	3	4	1	5	4	4	4	4	2	3	5	1	1	1	5	5	4	1	4	4	1
882	524	college	7	2	1	3	1	5	2	2	4	3	2	1	4	3	4	4	4	4	5	3	4	4	4	3	3	4	5	3
883	367	college	7	2	1	3	3	4	5	5	3	4	2	1	4	5	5	5	4	4	4	1	2	4	2	2	2	1	4	5
884	283	college	7	1	1	2	1	1	1	1	1	5	3	5	1	5	5	5	5	5	1	5	5	1	1	5	5	5	5	1
885	555	college	7	1	2	2	1	3	3	4	4	4	1	1	5	5	5	2	5	4	2	4	2	4	4	1	4	4	4	4
886	508	college	7	1	3	3	1	3	3	4	3	4	1	3	4	4	4	3	5	1	5	1	3	4	4	2	1	3	1	3
887	573	college	7	1	3	3	1	3	4	4	4	2	4	1	2	1	4	2	4	4	4	4	1	4	5	1	1	1	4	5
888	482	college	7	1	2	4	1	3	3	3	2	4	3	2	4	4	4	3	2	2	4	3	4	3	4	4	5	3	4	3
889	486	college	7	1	2	3	1	4	2	2	4	3	2	3	4	2	2	2	3	4	4	2	4	4	5	2	2	2	2	4
890	640	college	7	2	3	2	1	3	1	1	2	4	3	1	4	4	4	4	4	3	3	4	2	3	5	3	3	4	3	2
891	626	college	7	1	3	4	1	3	3	3	4	2	3	2	4	4	4	4	4	4	4	3	3	4	4	3	3	4	3	3
892	636	college	7	1	2	3	1	5	4	3	5	2	2	3	4	5	2	4	5	5	5	1	2	5	5	1	5	5	5	5
893	326	college	7	2	1	3	1	3	5	5	5	4	1	2	3	4	5	1	4	5	4	1	1	4	5	5	1	5	5	5
894	707	college	7	2	4	1	1	4	4	4	5	4	4	2	4	4	3	4	3	5	4	5	4	2	2	2	4	4	5	4
895	396	college	7	2	3	4	1	3	3	3	2	4	3	3	4	4	4	4	4	3	4	4	4	4	4	4	4	3	4	2
896	740	college	7	1	3	1	1	4	3	3	2	5	2	2	4	4	5	5	2	4	4	4	2	3	5	4	4	3	2	4
897	549	college	7	1	2	5	1	3	2	2	4	2	2	2	5	4	2	2	4	4	4	3	4	4	4	3	2	3	2	4
898	789	college	7	2	1	3	1	3	3	3	5	3	4	1	5	4	1	3	5	1	3	1	2	5	4	1	1	4	1	5
899	943	college	7	2	2	4	1	3	3	4	5	3	2	1	4	4	2	4	5	1	4	3	2	4	5	2	1	3	2	4
900	542	college	12	1	3	5	1	3	3	4	4	3	4	2	4	5	4	5	4	5	4	5	4	4	4	4	3	3	2	2
901	422	college	8	1	4	2	1	3	3	5	2	4	3	4	1	5	5	4	1	4	1	1	2	4	5	5	5	4	3	3
902	520	college	8	2	2	3	1	3	4	4	4	2	2	1	4	2	3	3	3	1	4	2	2	4	3	2	1	1	4	4
903	389	college	8	2	3	2	2	3	2	2	3	3	3	3	3	4	4	4	3	3	3	3	3	3	3	3	3	3	3	3
904	328	college	8	2	2	1	1	3	3	3	3	2	1	1	3	4	2	2	2	3	2	3	3	4	4	2	2	3	4	2
905	614	college	7	1	3	2	1	3	3	3	3	3	3	3	3	3	3	3	3	3	3	3	3	3	3	3	3	3	3	3
906	310	college	7	1	3	1	1	4	3	3	4	2	3	2	4	2	2	3	3	4	3	4	4	3	4	2	2	4	4	4
907	269	college	12	1	3	2	1	3	3	4	4	4	2	2	3	5	3	3	4	4	4	5	4	4	4	4	1	4	2	4
908	344	college	12	1	3	1	1	4	4	3	4	3	4	3	4	3	4	3	4	3	4	3	4	4	4	3	2	4	4	4
909	277	college	9	1	3	2	1	3	3	3	2	4	2	2	3	3	2	4	2	3	3	2	4	3	4	4	3	1	3	4
910	1311	college	12	1	3	3	1	3	2	2	2	4	2	2	2	4	4	2	2	4	2	4	4	3	3	3	4	2	5	3
911	343	college	12	2	3	2	2	4	4	4	4	4	1	2	5	4	4	1	2	1	1	4	1	4	5	4	1	4	4	2
912	336	college	7	2	2	3	2	3	2	3	4	4	2	1	4	5	5	4	5	1	4	5	4	4	5	2	3	5	5	2
913	300	college	12	1	2	3	1	4	3	3	3	2	2	3	4	4	2	4	4	4	4	3	2	4	3	2	2	3	2	3
914	261	college	12	1	2	3	1	3	2	3	4	2	3	4	4	4	2	3	3	5	3	3	3	3	4	3	3	3	2	3
915	298	college	8	1	3	3	3	1	2	3	2	4	2	3	2	4	4	4	2	4	4	5	5	3	1	2	3	3	5	5
916	517	college	7	1	2	5	1	4	2	2	5	2	2	2	4	3	3	3	4	2	3	3	3	4	5	2	2	4	4	4
917	186	college	10	1	4	4	1	3	3	2	4	4	4	4	4	4	3	3	3	3	3	3	3	4	4	4	4	4	4	4
918	260	college	8	2	3	3	3	3	5	5	4	2	4	2	4	3	4	3	3	3	5	3	4	4	3	3	2	4	4	5
919	224	college	8	2	5	3	1	5	1	1	5	1	4	1	5	1	3	5	5	5	5	2	3	5	5	3	2	5	5	5
920	112	college	12	2	3	3	1	3	3	3	3	2	3	3	3	3	3	3	3	3	3	3	3	3	3	3	3	3	3	3
921	359	college	8	2	1	2	1	5	5	5	5	1	3	1	5	3	1	1	5	1	5	1	1	5	5	1	1	5	1	5
922	179	college	9	2	1	3	1	5	5	5	2	4	1	1	3	4	5	3	3	5	2	3	5	2	4	4	2	4	4	3
923	392	college	8	1	3	3	1	3	3	3	4	2	2	1	3	2	1	1	4	1	2	2	1	3	4	1	1	4	3	2
924	413	college	8	1	2	6	1	3	4	4	4	2	2	2	4	3	4	3	4	4	3	1	3	3	4	2	3	3	2	3
925	331	college	8	2	2	4	1	3	4	4	5	5	3	4	4	4	4	4	4	4	4	4	4	4	4	4	4	3	5	3
926	331	college	8	2	2	2	1	3	4	4	4	2	3	2	4	3	2	4	4	2	4	2	2	3	4	2	2	3	2	4
927	214	college	9	1	3	3	2	3	3	3	3	3	3	3	3	3	3	3	3	3	3	3	3	3	3	3	3	3	3	3
928	266	college	8	2	3	2	1	3	2	2	3	3	4	4	4	4	4	4	4	4	4	4	4	4	4	4	4	4	4	4
929	492	college	8	1	2	3	1	2	4	4	4	2	2	1	4	4	3	2	3	4	4	2	2	3	3	3	2	1	4	4
930	216	college	12	1	3	1	1	3	3	3	4	4	4	4	4	4	4	4	4	4	4	4	4	4	4	4	4	4	4	4
931	281	college	9	1	5	4	2	2	5	5	1	5	1	3	1	5	5	1	1	5	1	3	5	1	1	5	5	1	5	1
932	273	college	9	1	3	3	1	3	4	4	4	4	4	2	3	4	4	3	2	2	4	4	5	3	2	4	4	3	5	4
933	153	college	9	1	2	3	2	2	2	2	2	2	2	2	3	2	2	3	2	3	2	2	2	2	3	3	3	2	2	2
934	148	college	8	2	3	4	1	3	3	3	3	3	3	3	3	3	3	3	3	3	3	3	3	3	3	3	3	3	3	3
935	363	college	9	2	2	3	2	4	4	4	5	2	1	2	4	2	4	4	4	2	4	2	2	4	4	2	2	3	4	4
936	609	college	8	2	3	3	1	3	5	5	3	4	3	2	4	4	4	1	2	2	3	3	2	4	4	4	4	5	5	3
937	374	college	9	2	2	5	2	4	5	5	4	2	2	1	4	3	4	5	3	2	4	4	2	4	4	2	4	4	4	5
938	328	college	8	2	2	3	1	3	4	4	3	3	3	2	3	4	4	3	3	4	3	2	3	2	3	3	4	3	5	3
939	928	college	8	1	2	2	2	4	5	5	3	3	2	3	4	4	4	3	3	3	4	2	2	4	3	2	2	3	2	5
940	214	college	7	2	3	5	3	3	3	3	3	3	3	3	3	3	3	3	3	3	3	3	3	3	3	3	3	3	3	3
941	232	college	9	1	3	4	1	4	2	2	3	3	2	2	3	4	4	4	2	2	2	2	2	2	2	4	4	2	3	2
942	348	college	12	1	3	4	1	3	3	3	3	3	3	3	3	3	3	3	3	3	3	3	3	3	3	3	3	3	3	3
943	377	college	11	2	3	6	1	5	3	3	4	4	5	2	4	4	2	4	3	2	4	3	4	4	4	2	3	3	4	4
944	399	college	12	1	2	3	1	3	4	4	4	2	2	2	2	3	4	4	4	2	4	2	2	4	4	2	3	2	4	4
945	326	college	9	1	3	3	1	3	3	3	3	3	2	2	4	4	4	3	4	4	4	4	4	4	4	3	2	2	2	4
946	252	college	7	1	1	5	1	3	5	5	5	1	1	1	5	1	5	1	5	1	5	1	1	5	1	1	1	5	5	5
947	252	college	7	1	4	6	1	4	3	3	2	4	2	2	3	4	4	3	2	2	4	4	2	3	2	4	4	2	4	2
948	298	college	7	2	3	1	2	3	3	3	4	4	4	3	2	4	4	3	3	3	4	4	3	4	3	2	3	3	4	3
949	273	college	7	2	2	4	3	3	3	3	5	1	3	3	3	3	3	3	3	3	2	3	2	4	2	4	3	3	4	2
950	282	college	7	1	5	3	3	3	5	5	5	5	5	5	5	5	5	5	5	5	5	5	5	5	5	5	5	5	5	5
951	396	college	9	1	3	3	2	3	3	3	4	5	3	2	4	4	4	3	3	4	4	4	3	4	1	3	4	4	3	4
952	529	college	9	2	2	4	1	5	5	5	4	4	1	3	4	4	3	3	3	4	3	2	2	3	2	3	2	2	3	3
953	265	college	7	2	1	5	2	5	5	5	4	3	3	1	4	4	3	1	4	1	4	1	1	4	1	1	1	5	5	5
954	282	college	8	1	1	3	3	3	4	4	4	2	3	1	5	2	4	1	5	4	5	2	1	4	5	2	2	4	3	4
955	651	college	8	1	2	6	1	4	4	4	4	4	2	3	4	4	3	4	3	4	4	4	4	2	4	2	4	4	4	3
956	358	college	7	1	2	3	1	4	5	5	3	3	1	2	2	4	5	3	2	4	3	5	2	3	3	5	2	2	4	3
957	357	college	7	2	4	3	1	2	2	1	1	4	1	4	2	4	4	4	3	5	2	4	4	2	5	4	4	3	5	2
958	344	college	7	1	3	2	1	4	2	2	4	4	4	3	4	4	3	4	3	4	3	4	4	4	4	4	4	4	4	3
959	518	college	9	2	3	3	1	3	4	4	5	2	5	2	5	4	2	5	5	2	5	2	4	5	2	2	4	5	2	5
960	320	college	7	1	3	1	2	3	4	4	4	4	3	4	3	4	4	4	4	4	4	2	3	3	4	3	3	2	3	3
961	275	college	9	2	3	3	1	3	3	3	4	3	3	3	3	3	3	3	3	3	3	3	3	3	3	3	3	3	3	3
962	325	college	7	1	2	3	1	4	5	5	4	4	2	1	4	4	4	4	5	4	4	4	4	4	4	2	2	5	4	4
963	577	college	9	1	3	5	1	3	2	3	4	2	3	1	4	3	2	2	4	2	3	2	4	3	1	2	2	4	2	3
964	430	college	9	1	2	3	1	3	2	2	2	4	3	4	2	4	4	3	2	4	4	4	4	3	3	4	3	3	4	3
965	343	college	7	1	1	2	2	3	2	2	5	1	3	1	5	1	3	3	5	4	5	1	3	4	4	1	1	5	3	5
966	422	college	7	1	3	3	1	3	3	3	3	5	3	2	3	4	5	3	2	4	4	3	4	4	4	5	4	4	4	3
967	351	college	7	1	2	3	3	4	4	5	4	4	3	3	3	4	4	3	3	3	3	3	3	3	3	3	3	3	4	3
968	335	college	7	2	1	3	1	4	1	1	4	4	2	4	4	5	5	3	4	1	4	4	4	4	4	4	2	4	5	5
969	496	college	8	1	2	3	1	4	4	4	4	3	2	2	4	4	5	4	3	4	2	2	2	2	1	2	3	4	5	5
970	341	college	8	1	2	4	1	3	1	1	4	5	2	3	4	4	5	4	4	5	3	5	3	3	3	3	3	3	3	4
971	560	college	8	1	2	3	1	4	5	4	2	4	4	2	4	4	4	2	4	2	4	2	2	4	5	2	2	2	2	4
972	445	college	9	1	2	2	1	3	2	2	4	3	3	2	4	3	4	3	4	3	4	2	2	4	4	2	2	3	2	4
973	826	college	8	2	3	4	2	3	5	5	4	3	2	1	4	1	3	3	5	1	2	4	1	5	2	2	1	3	4	3
974	485	college	7	1	2	3	1	3	3	4	5	2	1	1	4	3	2	1	4	5	5	3	3	4	3	2	2	4	4	4
975	596	college	12	1	3	3	1	3	3	4	4	2	4	2	4	2	3	4	4	3	4	4	4	4	4	2	3	4	4	3
976	452	college	7	1	3	3	1	3	4	4	3	4	2	2	4	4	4	3	3	4	4	5	2	1	3	3	3	2	4	4
977	169	college	7	2	2	3	2	4	2	2	5	3	3	1	4	3	4	4	3	3	3	2	2	3	3	3	3	3	3	4
978	478	college	7	1	2	3	1	3	2	2	3	2	2	2	3	4	4	2	3	2	2	3	2	3	4	2	2	3	3	3
979	426	college	7	1	1	2	2	3	5	5	5	1	2	1	4	2	2	3	4	2	5	4	2	4	1	4	1	4	4	4
980	570	college	7	1	2	3	1	3	3	3	4	4	2	2	4	4	4	4	3	2	4	2	2	4	4	5	2	4	2	4
981	559	college	7	2	2	3	2	3	3	4	3	4	1	3	4	4	3	3	4	3	3	3	3	3	3	4	4	3	3	4
982	365	college	12	1	4	5	1	2	3	3	3	3	3	3	3	3	3	3	3	3	3	3	3	3	3	3	3	3	3	3
983	546	college	7	1	2	3	1	3	5	5	3	4	3	3	3	4	4	3	3	3	3	4	3	3	3	2	2	3	3	3
984	779	college	9	1	1	1	3	3	3	4	4	3	3	2	4	4	4	4	4	3	3	3	4	4	4	3	5	5	4	4
985	644	college	9	1	3	5	1	4	2	3	1	2	1	4	2	5	5	4	1	4	2	4	4	1	3	3	4	2	5	1
986	706	college	7	1	1	3	2	5	4	4	4	3	2	2	5	4	3	3	3	4	3	3	3	4	4	4	3	4	3	3
987	632	college	7	1	3	4	2	3	4	5	2	4	2	1	2	4	3	4	3	4	3	2	2	1	1	3	1	1	2	3
988	446	college	12	1	3	3	1	4	4	4	5	3	1	2	4	4	3	5	3	4	3	2	2	4	4	2	1	4	2	5
989	879	college	7	2	3	3	1	3	2	3	1	4	2	3	2	4	5	4	2	3	2	4	4	2	2	4	3	2	5	2
990	1230	college	8	1	3	4	1	3	4	4	2	4	3	3	2	4	3	4	3	4	3	3	3	3	3	3	3	3	3	3
991	285	college	9	2	3	2	1	3	3	3	3	3	3	4	4	4	4	4	4	4	4	4	3	4	4	4	4	4	4	4
992	184	college	9	2	5	2	3	3	4	4	5	5	5	5	5	5	5	5	5	5	5	5	5	5	5	5	5	5	5	5
993	460	college	12	1	3	5	1	3	3	3	2	3	2	2	3	4	4	3	3	4	3	3	4	3	3	3	3	3	4	3
994	374	college	11	1	3	3	2	4	3	4	2	4	2	4	5	5	4	4	4	4	4	5	2	4	4	4	4	4	4	4
995	396	college	11	1	2	2	1	3	3	4	3	3	3	2	5	4	4	3	4	3	4	3	3	3	4	2	3	4	3	3
996	1448	college	8	1	2	5	1	3	4	4	4	4	2	2	3	4	4	3	3	3	3	3	4	2	4	3	3	2	4	3
997	553	college	12	2	2	2	1	3	3	3	4	3	2	1	5	2	2	3	4	2	2	2	1	4	4	2	2	2	2	4
998	568	college	7	1	2	4	1	3	3	3	4	2	2	2	4	3	4	4	4	1	3	2	2	4	4	2	2	4	3	3
999	659	college	11	1	3	3	3	3	3	3	4	2	2	1	4	3	3	4	4	3	4	4	4	4	4	2	3	4	2	4
1000	1605	college	9	2	2	3	2	3	3	3	4	4	1	3	4	4	4	4	3	3	4	5	3	3	4	3	4	4	2	4
1001	239	college	7	2	3	3	1	3	3	3	3	3	3	3	3	3	3	3	3	3	3	3	3	3	3	3	3	3	3	3
1002	1772	college	8	2	3	4	1	3	2	3	3	3	2	1	4	3	4	3	3	3	4	3	2	3	3	3	4	3	4	3
1003	232	college	12	1	2	3	2	5	5	5	5	1	3	1	5	3	3	3	3	3	5	5	1	5	5	1	1	3	1	5
1004	425	college	8	1	2	4	1	3	3	3	3	2	2	2	4	2	4	4	3	4	4	4	3	2	2	2	3	4	2	4
1005	986	college	7	2	2	3	3	3	3	3	3	4	2	1	4	4	4	4	2	5	5	1	3	4	5	4	4	3	2	4
1006	1970	college	7	2	3	4	2	3	4	4	4	3	3	1	4	2	2	2	4	1	3	3	2	2	4	1	3	3	5	4
1007	418	college	7	1	2	1	1	3	2	3	4	3	2	1	4	5	4	4	5	3	2	5	4	4	5	3	3	4	5	4
1008	644	college	7	1	2	5	1	3	4	4	4	2	2	2	4	4	2	2	4	3	4	2	3	4	3	3	2	2	2	4
1009	593	college	8	2	3	5	1	3	3	3	2	5	3	1	4	4	5	3	2	3	3	4	4	4	4	5	5	3	4	3
1010	375	college	8	1	3	5	1	3	2	3	3	4	3	4	3	4	4	4	3	4	4	4	4	3	3	4	4	3	4	4
1011	992	college	9	1	3	2	1	4	2	2	3	4	2	4	3	3	4	2	3	2	3	2	4	3	4	4	3	3	3	2
1012	367	college	12	2	3	5	1	3	3	3	4	3	3	2	4	4	3	4	4	3	3	4	2	3	4	2	2	4	4	3
1013	248	college	12	1	3	5	1	3	4	4	2	4	2	4	2	5	4	4	1	5	4	3	3	2	1	3	3	2	2	2
1014	370	college	8	1	3	2	1	4	3	3	4	3	3	3	3	3	3	3	3	3	3	3	3	3	3	3	3	3	3	3
1015	160	college	10	2	3	5	1	3	3	3	3	3	3	3	3	3	3	3	3	3	3	3	3	3	3	3	3	3	3	3
1016	327	college	10	1	2	2	1	3	3	3	3	3	4	4	2	5	5	5	3	3	5	5	4	4	5	5	5	4	4	3
1017	369	college	10	1	3	4	1	3	1	1	4	4	1	3	4	5	5	4	4	4	4	5	5	4	5	3	3	3	5	4
1018	346	college	10	1	2	4	1	4	3	3	4	2	2	2	4	3	4	4	4	4	4	2	2	4	4	4	2	4	4	4
1019	372	college	10	1	3	2	1	4	4	4	4	3	2	3	4	3	4	4	3	4	4	2	3	4	3	3	2	3	2	4
1020	323	college	10	1	2	4	1	3	3	3	2	2	2	2	4	2	3	3	3	3	3	3	3	3	3	3	3	3	3	3
1021	807	college	8	2	2	4	1	3	5	5	4	3	2	2	5	5	2	5	2	2	2	2	2	4	4	2	2	4	2	4
1022	612	college	10	1	4	4	1	3	3	3	3	2	2	2	4	2	1	4	2	2	4	2	2	4	4	1	3	4	2	3
1023	673	college	10	2	3	4	1	4	3	3	5	1	5	1	5	2	5	5	5	1	1	1	2	5	5	1	2	1	1	5
1024	740	college	8	1	2	3	1	3	2	2	4	2	3	3	4	4	4	4	3	2	4	3	4	4	4	4	3	2	3	2
1025	278	college	7	1	3	4	1	3	3	3	3	4	3	2	3	4	5	4	3	3	3	4	3	3	3	4	4	3	4	3
1026	390	college	12	1	3	3	1	3	2	2	2	2	2	1	4	4	3	1	2	3	2	4	2	2	4	1	1	3	4	2
1027	857	college	8	1	3	5	1	3	3	3	3	3	2	3	3	4	4	4	3	4	3	3	3	2	3	3	4	3	4	3
1028	368	college	7	1	1	4	3	3	5	5	5	1	3	2	4	5	3	3	3	3	3	3	3	4	4	2	2	4	5	5
1029	474	college	12	1	2	3	1	4	2	2	4	3	2	1	4	3	3	2	4	4	4	2	2	4	5	2	2	4	3	4
1030	1103	college	7	1	2	5	2	3	3	3	2	4	2	3	2	4	4	4	3	2	3	2	4	4	4	2	2	2	2	2
1031	359	college	12	1	4	3	1	2	4	4	4	2	2	2	4	4	4	4	2	2	2	4	2	3	2	2	4	2	4	4
1032	297	college	7	1	3	2	3	3	4	4	3	2	2	2	4	4	3	3	3	3	3	3	3	3	3	3	3	3	3	3
1033	555	college	7	1	4	2	1	1	5	5	1	5	1	5	3	5	5	5	1	5	4	2	2	1	1	5	5	1	1	5
1034	1052	college	7	1	3	2	1	3	3	3	4	4	4	2	4	4	4	4	4	2	4	4	4	2	4	4	4	4	4	4
1035	285	college	10	1	2	2	1	4	2	3	4	2	2	4	3	2	4	4	4	4	4	4	4	4	4	4	4	3	3	3
1036	272	college	12	2	3	3	2	3	3	3	3	3	3	3	3	3	3	3	3	3	3	3	3	3	3	3	3	3	3	3
1037	283	college	12	1	3	1	1	3	3	4	4	4	4	4	4	4	4	4	4	4	4	3	2	4	4	2	1	4	4	4
1038	229	college	10	1	3	2	1	3	3	3	3	3	3	3	3	3	3	3	3	3	3	3	3	3	3	3	3	3	3	3
1039	326	college	8	1	3	6	2	3	2	1	4	2	4	3	4	4	4	4	3	2	5	3	4	4	2	4	3	5	4	4
1040	579	college	9	1	3	5	2	3	3	4	4	2	2	2	4	4	2	4	4	2	4	2	2	4	4	2	2	4	4	4
1041	299	college	7	2	3	3	1	3	3	3	2	3	3	3	3	3	3	3	3	4	4	4	4	4	4	4	4	4	4	4
1042	313	college	12	1	2	4	3	3	4	4	3	2	2	2	4	3	1	1	4	3	4	2	2	3	3	2	2	4	3	4
1043	394	college	12	1	3	2	1	3	3	3	4	2	4	3	4	4	2	3	4	4	3	4	4	4	4	2	2	4	3	3
1044	205	college	12	2	3	3	1	4	3	3	4	4	4	4	4	4	4	4	4	4	4	4	4	4	4	4	4	4	4	4
1045	527	college	12	1	2	1	1	3	2	2	5	1	1	1	5	4	1	1	5	2	2	1	1	5	5	1	1	5	1	5
1046	499	college	12	2	3	3	3	3	5	4	2	4	2	4	4	5	4	2	2	3	3	4	3	4	4	4	5	2	5	4
1047	319	college	12	2	2	3	1	3	3	3	5	2	4	1	4	2	2	2	4	1	2	2	2	4	4	2	2	4	4	2
1048	397	college	9	2	2	2	2	3	2	3	3	3	2	2	4	4	4	3	4	4	4	2	3	4	4	2	4	2	2	4
1049	444	college	9	2	1	3	1	4	4	3	3	4	2	1	3	4	4	4	4	1	4	1	1	4	4	3	4	2	3	2
1050	433	college	8	2	2	4	1	3	2	3	5	1	3	3	4	4	2	4	5	1	5	1	2	4	4	1	1	5	3	5
1051	505	college	8	1	2	1	1	4	3	3	4	2	4	2	4	3	1	3	4	3	3	2	3	4	4	2	4	3	2	4
1052	652	college	8	2	2	5	1	3	3	3	4	3	2	2	4	4	4	3	3	2	3	3	3	4	4	4	3	4	3	2
1053	635	college	12	1	2	3	1	3	2	2	3	3	2	2	3	3	4	4	4	4	4	4	4	4	4	4	4	4	4	3
1054	421	college	12	1	1	4	1	3	3	3	4	3	2	1	5	4	3	3	4	3	3	1	1	4	4	1	2	4	4	4
1055	368	college	12	1	2	5	1	3	2	2	4	2	3	2	4	4	1	4	3	4	4	4	3	4	3	2	2	2	2	3
1056	147	college	12	2	2	5	1	2	5	5	4	3	4	4	4	4	4	2	4	3	3	3	3	4	5	5	2	1	1	4
1057	529	college	12	1	2	3	1	3	3	3	3	2	2	2	4	2	3	4	3	4	4	2	4	4	4	2	2	3	3	2
1058	405	college	7	2	2	6	1	3	1	2	5	1	5	1	5	1	5	5	5	5	1	5	1	5	5	1	1	5	3	3
1059	421	college	9	2	1	5	1	3	4	4	3	3	3	1	4	3	4	4	4	2	3	2	5	3	4	2	4	4	4	4
1060	795	college	7	2	1	3	1	3	2	2	1	4	3	1	4	4	5	3	2	4	4	2	3	3	4	4	3	4	2	5
1061	400	college	9	1	2	3	2	3	5	5	4	1	1	1	3	4	4	3	2	1	3	2	3	3	4	2	2	2	3	5
1062	1015	college	12	1	2	3	1	3	2	3	3	3	2	2	3	3	3	4	3	3	3	1	3	3	4	2	3	3	3	3
1063	747	college	9	2	4	4	2	3	3	4	4	3	4	2	4	4	4	4	3	1	4	3	3	4	4	3	2	4	5	4
1064	455	college	10	1	4	3	1	3	2	2	2	4	3	3	2	5	4	3	2	4	3	3	3	2	2	3	4	3	3	3
1065	143	college	12	1	2	3	2	3	3	3	3	3	3	3	3	3	3	3	3	3	3	3	3	3	3	3	3	3	3	3
1066	252	college	9	1	3	2	1	3	3	4	4	4	3	1	4	3	3	3	4	4	3	3	4	4	5	4	3	4	5	3
1067	423	college	12	1	3	3	1	3	3	3	4	4	2	2	2	4	4	4	4	4	4	3	2	2	4	2	4	4	4	2
1068	1185	college	12	1	2	2	1	3	2	2	2	4	2	2	4	3	1	3	3	2	4	4	4	4	3	2	2	4	3	3
1069	353	college	12	1	2	2	2	3	4	4	3	3	3	3	3	4	3	3	3	4	2	3	4	3	3	3	3	3	4	3
1070	643	college	12	1	3	5	1	3	2	3	4	5	3	4	2	4	5	3	2	4	4	3	4	3	4	4	4	3	5	4
1071	471	college	12	1	3	2	1	3	2	2	4	3	2	2	4	4	4	2	4	1	4	4	4	3	3	2	3	2	2	4
1072	572	college	12	1	2	2	1	3	2	2	4	3	2	2	3	4	4	4	4	4	4	4	4	4	4	4	3	3	4	4
1073	742	college	12	2	2	3	1	4	3	3	3	4	2	2	4	2	4	3	4	2	2	4	2	3	4	2	2	4	4	4
1074	378	college	12	1	2	1	2	3	3	3	2	4	1	2	4	5	1	4	2	5	4	4	2	3	4	1	1	2	5	2
1075	366	college	12	1	3	2	1	3	3	3	2	3	2	3	2	4	4	3	4	3	3	3	3	2	3	3	3	2	2	4
1076	431	college	7	1	3	4	1	3	3	3	3	3	3	4	4	4	4	4	4	4	4	5	4	3	3	3	4	3	4	4
1077	128	college	12	1	2	2	1	2	3	3	3	2	3	2	3	2	3	2	3	3	1	1	1	1	1	1	1	1	1	3
1078	243	college	7	2	1	4	1	1	3	3	1	1	1	1	1	1	1	1	1	1	1	1	1	1	1	1	1	1	1	1
1079	718	college	7	2	3	5	3	3	2	1	2	2	2	2	4	4	4	4	3	3	4	4	3	4	4	4	4	4	4	4
1080	765	college	7	2	2	5	1	3	3	3	3	3	2	1	4	4	4	4	4	2	2	2	2	4	4	2	4	4	4	3
1081	738	college	7	1	2	2	1	3	3	3	3	2	3	1	3	4	5	3	1	5	3	1	3	3	3	3	5	3	3	3
1082	657	college	9	1	2	5	1	3	3	3	3	3	3	3	3	3	3	3	3	3	3	3	3	3	3	3	2	2	2	2
1083	641	college	8	2	2	5	1	3	2	2	2	4	2	3	2	4	4	4	3	3	3	3	3	3	3	4	3	4	4	2
1084	475	college	7	1	3	5	1	3	3	3	3	4	4	3	3	4	2	4	4	4	3	4	4	3	4	3	4	3	3	3
1085	273	college	7	2	2	5	1	3	4	4	4	4	4	3	3	3	3	3	3	3	4	3	3	3	3	3	3	3	3	3
1086	769	college	7	2	4	3	1	4	3	2	1	5	1	1	4	5	5	3	3	3	4	5	5	1	5	5	2	4	5	3
1087	469	college	7	1	3	1	1	3	2	2	3	4	2	2	4	4	4	2	4	4	2	2	2	2	4	4	2	2	2	4
1088	617	college	7	1	2	5	1	3	3	4	4	4	3	2	3	5	4	2	3	5	4	4	4	4	4	3	4	2	4	3
1089	683	college	7	2	3	5	1	3	3	3	2	2	3	2	4	3	3	4	2	4	4	3	2	3	4	3	3	2	4	3
1090	368	college	12	2	3	2	1	3	3	3	4	4	3	3	4	4	4	3	4	3	4	3	3	4	4	4	4	4	3	4
1091	341	college	9	1	3	3	3	3	3	3	3	3	3	3	3	3	3	3	3	3	3	3	3	3	3	3	3	3	3	3
1092	362	college	12	2	1	3	3	3	4	4	4	3	2	2	4	2	3	3	4	2	3	3	2	3	3	3	3	3	3	3
1093	675	college	12	1	2	2	1	3	4	4	3	2	3	1	5	2	2	4	4	1	4	1	2	4	4	2	1	3	2	4
1094	501	college	12	1	3	1	1	3	2	3	3	4	1	3	3	4	4	4	3	4	4	4	4	3	3	4	3	3	3	2
1095	252	college	12	1	4	5	1	3	3	3	3	3	3	3	3	3	3	3	2	3	2	3	3	2	2	4	4	4	4	4
1096	865	college	12	1	2	3	1	4	2	2	3	2	2	2	4	4	5	4	4	4	4	4	2	2	2	2	2	4	5	3
1097	314	college	9	1	3	1	1	3	3	3	3	2	1	3	3	4	3	3	2	2	3	4	4	3	2	3	2	2	3	3
1098	976	college	12	1	2	2	1	3	4	4	5	2	2	4	5	4	3	4	4	5	5	5	3	3	3	4	3	4	4	4
1099	3225	college	12	1	1	3	1	3	3	3	4	4	2	3	3	4	4	3	4	4	4	3	4	4	3	4	4	3	4	4
1100	400	college	12	2	2	2	1	4	3	3	3	2	3	3	4	4	3	4	4	3	4	4	2	3	4	2	2	3	2	4
1101	230	college	12	1	2	2	1	3	4	4	4	4	4	2	4	2	2	2	4	4	4	3	4	4	4	4	4	4	3	4
1102	140	college	8	2	1	5	3	1	1	1	1	1	1	1	1	1	1	1	1	1	1	1	1	1	1	1	1	1	1	1
1103	538	college	8	1	1	5	1	4	3	3	3	2	1	1	5	3	1	1	4	5	4	4	5	3	5	4	4	3	5	4
1104	512	college	8	1	3	6	1	3	3	3	3	3	2	2	4	2	2	3	4	2	3	2	3	4	4	2	2	2	3	4
1105	766	college	8	1	2	5	1	4	3	3	4	2	3	3	4	4	3	3	4	3	3	3	2	4	4	3	2	2	2	3
1106	531	college	8	1	2	5	1	3	3	3	3	3	3	3	3	4	4	3	3	3	3	3	2	3	3	3	1	4	3	3
1107	856	college	8	1	1	1	1	3	2	3	4	1	1	1	5	3	1	1	4	3	3	1	1	3	5	1	1	4	1	3
1108	372	college	8	1	3	4	1	5	3	3	4	4	4	2	4	3	3	3	3	3	3	3	3	3	3	3	3	3	3	3
1109	347	college	8	1	1	3	1	3	3	3	4	2	2	2	5	5	4	4	4	3	5	3	2	3	5	3	2	3	1	4
1110	377	college	8	1	2	5	1	3	3	3	4	2	2	2	4	2	3	3	3	3	4	3	3	3	4	3	2	2	3	3
1111	328	college	8	1	2	5	1	3	3	3	4	3	3	4	4	3	3	3	2	3	4	3	3	4	4	3	4	4	4	3
1112	420	college	8	1	2	4	1	3	3	3	4	4	2	2	4	4	4	3	4	3	3	3	2	4	4	2	2	2	4	4
1113	349	college	8	1	2	4	1	4	4	4	4	4	3	2	4	4	4	4	4	4	4	2	3	4	5	3	4	4	4	1
1114	108	college	9	1	3	2	1	2	5	5	2	3	3	2	3	3	3	3	3	3	3	3	3	3	3	3	3	3	3	3
1115	273	college	9	1	3	5	1	3	3	3	4	4	2	3	3	4	4	3	4	2	3	2	4	2	3	4	4	3	1	2
1116	124	college	9	1	3	2	1	3	3	3	4	3	3	3	3	3	3	3	3	3	3	3	3	3	3	3	3	3	3	3
1117	263	college	9	1	1	2	1	3	3	3	4	1	1	1	5	2	2	2	5	2	5	2	2	5	5	2	2	5	2	5
1118	391	college	9	1	2	2	1	3	3	4	4	4	2	3	4	4	4	3	4	4	4	4	2	4	4	4	2	4	2	3
1119	360	college	9	2	2	2	1	3	3	3	3	4	3	4	3	4	5	4	3	2	4	3	4	3	4	3	3	2	3	3
1120	380	college	9	1	3	2	1	2	5	5	4	3	3	3	3	3	3	3	3	3	3	3	3	3	3	3	3	3	3	3
1121	542	college	9	1	1	2	1	4	4	3	5	4	2	1	5	1	3	5	5	2	4	1	1	5	5	4	1	5	5	5
1122	535	college	9	2	3	2	3	4	2	2	1	4	2	3	2	5	3	3	2	3	3	3	5	2	3	3	5	3	3	3
1123	307	college	9	1	2	2	1	3	3	3	4	2	1	2	4	4	2	3	4	4	4	2	2	4	4	2	2	4	2	3
1124	320	college	9	1	3	2	2	3	4	4	1	5	1	2	1	5	5	1	1	5	1	3	4	5	1	3	3	3	5	1
1125	299	college	9	1	2	2	3	4	3	3	3	5	3	1	2	3	4	3	3	3	3	3	3	3	3	4	4	3	3	3
1126	202	college	9	1	3	2	3	2	3	2	3	3	3	3	2	5	4	4	2	4	2	4	4	3	2	4	4	3	5	4
1127	565	college	9	1	2	4	3	3	3	3	4	4	4	3	4	4	4	4	4	4	4	4	4	4	4	4	4	4	4	3
1128	683	college	9	1	2	3	1	3	4	4	4	2	2	3	4	3	2	4	4	3	5	1	1	4	4	2	3	4	2	4
1129	368	college	9	1	3	2	3	3	4	4	4	2	4	4	4	5	4	3	3	2	1	2	3	2	3	2	1	4	5	5
1130	323	college	9	1	2	3	1	4	3	4	4	4	3	4	5	4	2	3	4	2	4	4	4	4	4	3	3	4	3	4
1131	303	college	9	1	3	4	3	3	2	2	4	2	1	2	2	4	4	3	3	4	2	3	2	3	3	4	4	2	4	3
1132	355	college	8	1	2	3	3	3	3	3	4	2	2	2	4	3	3	4	4	2	4	2	2	4	4	2	2	4	4	4
1133	567	college	9	2	3	2	3	3	3	3	3	3	3	3	3	3	3	3	3	3	3	3	3	3	3	3	3	3	3	3
1134	349	college	9	1	3	3	2	3	5	5	5	1	1	1	5	5	2	5	3	3	3	3	3	4	4	2	2	5	5	3
1135	393	college	9	2	2	2	2	3	4	4	4	4	2	1	4	2	3	4	2	3	2	2	4	4	5	1	4	5	4	2
1136	426	college	9	1	1	2	1	3	3	3	4	2	4	2	4	4	4	4	4	4	4	2	2	4	4	2	2	4	4	4
1137	689	college	9	2	1	2	1	3	3	3	5	2	4	3	5	2	2	4	5	2	4	2	4	5	5	1	1	5	1	4
1138	286	college	9	1	3	3	2	3	3	5	3	2	1	1	2	4	4	1	1	2	2	5	3	2	1	2	1	1	2	1
1139	235	college	9	2	3	2	1	3	3	3	3	3	3	3	3	3	3	3	3	3	3	3	3	3	3	3	3	3	3	3
1140	500	college	9	2	2	5	2	3	3	4	3	3	2	4	4	3	2	4	4	2	3	4	2	4	5	3	2	4	3	4
1141	432	college	9	1	3	2	1	3	3	3	2	5	1	3	3	5	2	2	2	2	4	4	4	2	2	4	2	2	3	2
1142	135	college	9	2	2	5	3	2	3	3	3	3	3	2	3	3	3	3	2	3	3	2	3	2	3	3	2	3	2	3
1143	191	college	8	2	3	4	3	3	3	3	3	3	3	3	3	3	3	3	3	3	3	3	3	3	3	3	3	3	3	3
1144	285	college	9	1	2	2	3	3	3	4	4	5	4	2	1	5	5	3	4	4	5	1	4	4	5	4	2	4	1	4
1145	524	college	9	2	2	2	2	3	3	4	3	4	2	2	2	3	5	3	2	1	2	4	2	4	4	4	4	4	4	4
1146	293	college	9	2	1	2	2	5	5	5	5	1	5	1	5	1	4	5	4	4	5	2	1	5	5	1	1	5	4	5
1147	743	college	9	1	2	5	1	3	3	3	4	1	1	1	5	2	2	4	4	4	4	1	3	4	4	1	1	3	3	3
1148	254	college	9	2	2	2	2	4	3	3	4	3	3	3	3	3	3	3	3	3	3	3	3	3	3	3	3	3	4	4
1149	295	college	9	1	2	2	1	4	3	2	4	4	2	1	4	2	5	3	4	2	4	2	2	4	2	2	2	1	2	3
1150	155	college	9	2	3	2	3	3	3	3	3	4	3	3	4	4	4	4	4	4	4	4	4	4	4	4	4	4	4	4
1151	402	college	9	2	3	5	3	3	3	3	5	2	2	1	4	4	3	2	2	2	2	1	3	4	4	1	2	3	3	4
1152	206	college	9	2	3	3	1	3	3	3	3	3	3	3	3	3	3	3	3	3	3	3	3	3	3	3	3	3	3	3
1153	531	college	8	1	3	2	2	3	1	1	2	4	1	1	4	5	2	3	2	4	4	5	4	3	4	4	4	4	2	5
1154	423	college	9	2	2	2	1	2	2	3	2	4	2	4	4	4	4	4	2	4	4	5	2	4	4	4	2	4	5	4
1155	125	college	9	2	2	2	1	3	3	3	3	3	3	3	3	3	3	3	3	3	3	3	3	3	3	3	3	3	3	3
1156	845	college	9	2	2	2	1	3	4	4	5	2	4	2	4	2	2	4	4	1	4	2	3	4	4	2	2	4	4	4
1157	564	college	9	2	2	2	2	2	4	4	2	2	2	4	4	3	4	4	4	2	4	4	2	4	4	4	4	3	4	4
1158	321	college	9	2	1	2	1	3	5	5	5	3	3	1	5	4	1	3	3	1	4	1	1	5	5	2	1	4	1	5
1159	488	college	9	1	1	2	3	3	5	4	5	4	3	2	5	4	3	4	5	5	5	1	2	4	4	2	2	4	4	4
1160	232	college	9	2	3	2	1	4	4	4	4	4	4	4	4	4	3	4	3	3	4	4	4	4	4	3	3	4	4	3
1161	356	college	9	2	2	2	1	3	3	4	5	2	3	3	3	3	3	3	3	3	3	3	3	3	3	3	3	3	3	3
1162	132	college	9	2	3	2	2	3	4	4	3	3	3	3	3	3	3	3	3	3	3	3	3	3	3	3	3	3	3	3
1163	824	college	9	2	3	2	1	3	3	3	2	4	1	4	3	4	4	3	3	2	3	2	4	2	4	4	3	2	3	2
1164	554	college	9	1	3	2	1	4	4	4	2	4	3	2	4	4	4	3	4	4	2	4	3	4	4	4	4	4	4	3
1165	475	college	9	1	4	5	1	3	1	1	2	4	3	3	3	4	2	2	2	2	2	3	4	2	3	4	4	3	4	3
1166	618	college	9	1	3	2	3	3	3	4	4	3	4	2	1	1	4	2	1	2	2	4	3	3	3	3	4	4	4	2
1167	422	college	9	2	2	2	1	3	3	4	5	1	5	1	5	1	1	5	5	1	5	1	1	5	2	1	1	5	5	5
1168	169	college	9	2	1	3	3	5	5	5	5	1	2	3	5	5	5	5	5	5	5	5	5	5	5	5	5	5	5	5
1169	387	college	8	1	3	5	1	3	3	3	3	3	3	3	3	3	3	3	3	3	3	3	3	3	3	3	3	3	3	3
1170	284	college	9	1	3	5	2	3	3	3	1	5	1	3	2	4	4	4	3	3	3	4	2	2	2	4	4	2	3	2
1171	485	college	9	1	3	2	1	3	3	3	2	4	4	2	4	4	5	4	4	4	4	3	2	3	3	4	2	3	2	4
1172	139	college	9	2	3	2	1	3	3	3	3	3	3	3	3	3	3	3	3	3	3	3	3	3	3	3	3	3	3	3
1173	265	college	9	1	2	2	1	3	3	3	4	4	4	2	4	4	4	4	4	5	2	3	4	3	4	4	3	1	2	2
1174	72	college	9	2	4	2	1	4	3	4	3	4	3	4	3	4	3	4	3	4	4	3	4	3	4	3	4	3	4	3
1175	251	college	9	2	2	2	3	3	2	2	3	2	4	2	4	3	4	4	4	2	3	4	2	4	4	2	2	4	4	3
1176	347	college	9	1	2	2	3	3	4	4	4	1	4	2	5	4	1	4	4	1	2	2	3	5	5	1	1	1	4	4
1177	156	college	9	2	5	2	1	5	5	5	5	5	4	1	5	4	4	3	3	3	4	4	3	4	4	4	4	5	1	5
1178	409	college	9	2	1	2	1	4	3	2	5	2	1	3	5	3	2	4	4	2	3	2	3	4	4	3	2	4	3	3
1179	327	college	9	1	2	2	1	3	4	4	5	3	2	1	4	2	2	3	4	4	2	2	2	4	4	2	2	4	4	2
1180	608	college	9	1	3	5	1	3	3	3	4	3	3	3	4	4	4	4	4	3	3	3	4	3	4	3	3	4	3	3
1181	398	college	9	1	2	2	1	3	4	4	2	2	2	2	4	4	4	4	4	4	2	4	2	4	4	2	2	4	2	4
1182	240	college	9	1	3	4	1	3	3	3	4	3	4	2	4	4	4	4	3	4	3	4	4	3	4	4	3	4	4	3
1183	500	college	9	1	1	2	1	3	4	3	5	1	2	2	5	4	2	1	5	4	5	2	2	5	5	2	2	5	3	5
1184	648	college	7	2	1	5	2	4	5	5	5	1	5	1	5	1	1	1	5	1	5	1	1	5	5	1	1	1	1	5
1185	372	college	9	1	3	2	3	5	1	1	2	4	3	3	4	4	4	2	4	2	4	4	5	4	5	3	4	4	4	4
1186	249	college	9	2	3	4	1	3	3	3	3	3	3	3	3	3	3	3	3	3	3	3	3	3	3	3	3	3	3	3
1187	458	college	8	2	3	5	1	3	4	4	4	4	2	2	3	4	4	3	2	2	2	2	4	3	3	4	4	2	4	2
1188	235	college	8	2	3	3	1	3	3	3	3	3	3	3	3	3	3	3	3	3	3	3	3	3	3	3	3	3	3	3
1189	289	college	8	1	3	5	1	3	4	4	4	2	4	3	4	4	2	4	2	4	4	4	2	4	4	2	2	4	2	2
1190	269	college	8	1	3	5	1	5	3	3	4	5	2	4	4	4	4	4	4	4	4	2	4	3	5	4	4	4	4	4
1191	302	college	8	2	2	4	1	4	4	4	4	4	4	2	4	3	4	4	4	4	4	4	4	4	4	4	4	4	4	4
1192	320	college	8	1	4	5	1	3	3	3	4	2	4	2	4	3	4	3	3	3	3	3	3	3	4	3	3	3	3	3
1193	344	college	8	1	2	5	1	3	3	4	4	1	2	1	5	4	4	3	4	2	4	4	4	4	4	2	2	2	4	4
1194	355	college	8	1	2	5	3	3	3	3	4	3	4	1	3	4	4	4	3	4	4	2	5	4	1	2	4	3	4	5
1195	351	college	8	1	3	3	1	3	3	3	3	3	3	3	3	3	3	3	3	3	3	3	3	3	3	3	1	3	2	2
1196	336	college	8	1	2	4	1	3	4	4	5	1	1	1	5	1	1	1	5	1	4	3	1	4	4	1	1	4	1	4
1197	377	college	8	1	2	3	1	5	4	4	5	2	3	1	5	2	4	4	4	4	4	1	1	5	5	3	2	4	3	4
1198	331	college	8	1	3	3	1	3	3	4	4	4	2	2	4	4	3	4	4	4	4	4	3	2	4	4	2	2	2	4
1199	365	college	8	1	1	4	1	4	4	3	5	1	1	1	5	2	2	4	4	2	5	1	2	4	5	1	1	4	2	3
1200	446	college	8	1	2	5	1	3	4	4	5	2	3	2	4	3	2	3	5	4	4	2	3	4	4	2	2	5	3	5
1201	418	college	8	2	2	4	3	3	3	4	3	4	3	2	2	3	5	2	3	2	3	4	2	4	3	3	3	3	4	4
1202	474	college	8	2	1	5	1	4	5	5	4	4	4	2	4	2	4	4	4	4	4	2	4	4	2	2	2	4	4	2
1203	548	college	8	1	1	4	3	5	2	4	5	2	4	1	5	5	5	4	4	2	4	1	2	4	5	1	2	4	3	3
1204	617	college	8	1	2	3	3	3	4	4	4	2	4	2	4	2	2	3	4	2	4	2	2	4	4	2	2	4	2	3
1205	577	college	8	1	2	4	3	3	4	4	4	2	2	1	4	4	4	3	4	3	4	2	3	3	4	3	2	4	4	4
1206	502	college	8	1	2	4	1	3	3	3	4	3	3	2	4	4	3	3	4	3	3	2	3	3	4	2	2	3	2	4
1207	411	college	8	1	1	5	1	3	2	2	5	1	3	1	5	2	2	2	5	4	4	2	2	4	5	2	1	3	1	5
1208	286	college	8	2	3	4	3	3	3	3	4	2	2	2	5	2	2	4	3	2	4	4	4	4	4	2	2	4	5	5
1209	409	college	8	1	2	4	2	4	3	2	5	3	2	2	5	3	2	4	4	4	5	1	1	4	3	2	2	4	2	5
1210	1071	college	8	1	3	3	3	3	4	4	4	2	3	2	4	3	3	3	3	3	4	2	3	3	4	3	2	3	3	3
1211	184	college	8	1	3	4	1	3	3	3	3	3	3	3	3	3	3	3	3	3	3	3	3	3	3	3	3	3	3	3
1212	933	college	10	2	2	3	1	4	3	3	4	2	2	3	4	4	4	3	3	4	4	3	3	4	3	2	3	4	4	4
1213	310	college	8	1	3	5	1	3	3	3	4	4	2	1	4	4	4	2	3	4	4	2	4	4	4	4	4	4	4	4
1214	238	college	8	1	1	2	1	3	5	5	5	1	4	1	5	1	4	1	5	1	3	5	2	4	3	2	2	4	4	4
1215	477	college	8	2	3	3	1	3	2	2	2	4	2	2	3	4	4	4	4	2	4	4	4	3	4	2	3	4	4	4
1216	387	college	8	1	2	3	1	3	4	4	4	2	1	2	5	5	5	5	5	3	4	4	2	2	2	2	2	4	4	4
1217	310	college	10	2	2	3	1	3	3	3	4	1	1	1	4	2	1	4	4	3	4	3	3	4	3	3	1	5	3	3
1218	442	college	8	1	2	3	1	3	3	4	4	2	2	2	4	2	2	4	4	3	4	2	3	3	4	3	2	3	3	3
1219	240	college	8	1	3	3	1	3	3	3	4	3	2	2	4	2	4	4	4	4	4	4	4	4	4	4	3	4	3	3
1220	647	college	8	2	2	5	3	3	1	3	1	4	2	3	4	4	2	3	4	2	2	4	3	3	5	2	3	2	4	3
1221	169	college	8	2	1	2	1	3	4	4	5	1	2	1	5	1	2	4	5	2	2	3	1	5	5	1	1	5	2	5
1222	173	college	7	2	3	4	3	4	1	3	4	4	4	4	4	4	4	4	4	4	4	4	4	4	4	4	4	5	3	3
1223	331	college	8	2	4	1	1	3	1	1	1	5	3	3	2	5	5	4	2	2	4	3	5	4	4	5	4	2	4	3
1224	208	college	11	1	3	3	1	3	4	4	4	4	3	2	4	4	4	4	4	4	3	4	3	4	4	4	3	4	4	4
1225	148	college	12	2	1	3	1	5	5	5	1	1	1	1	1	1	1	1	1	1	1	1	1	1	1	1	1	1	1	1
1226	1076	college	7	1	1	4	3	3	3	3	4	3	1	1	5	2	2	4	4	4	5	4	3	4	5	2	4	4	4	4
1227	215	college	10	1	3	5	3	3	3	3	3	3	3	3	3	3	3	3	3	4	4	3	3	3	3	3	3	3	3	3
1228	497	college	11	2	4	5	1	2	3	2	4	2	2	2	4	4	4	2	4	2	4	4	2	4	4	3	2	4	2	4
1229	177	college	10	1	2	2	3	3	1	1	2	4	1	5	3	5	4	5	2	4	1	3	4	2	3	5	4	1	3	2
1230	182	college	9	2	2	1	3	4	3	4	3	3	3	3	3	3	4	3	4	3	4	3	3	4	3	4	3	4	4	4
1231	515	college	11	2	3	5	3	3	2	3	3	4	2	2	4	4	3	4	3	4	4	3	3	4	4	3	3	4	4	4
1232	124	college	9	2	3	4	1	3	3	3	3	3	3	3	3	4	3	3	3	3	3	3	3	3	3	3	3	3	3	3
1233	266	college	10	1	3	3	3	3	2	2	2	5	1	5	2	5	4	5	3	1	5	4	4	2	1	5	3	4	1	2
1234	701	college	10	1	2	4	3	3	3	3	4	2	2	2	4	2	2	4	4	2	2	4	2	4	2	2	2	4	4	2
1235	435	college	11	1	3	5	3	3	4	4	4	2	3	2	4	4	2	4	4	2	4	4	3	4	4	2	3	3	2	4
1236	198	college	9	2	3	2	1	4	4	4	4	4	3	3	3	3	3	4	3	5	3	2	3	3	2	3	4	3	4	4
1237	262	college	7	1	2	2	1	4	3	4	4	2	4	2	4	2	2	2	2	2	2	4	2	4	4	2	2	4	4	4
1238	115	college	7	2	5	4	1	5	5	5	5	5	5	5	5	5	5	5	5	5	5	5	5	5	5	5	5	5	5	5
1239	257	college	8	1	2	5	3	4	3	3	5	1	3	1	5	4	3	3	4	1	3	1	2	4	5	1	3	3	3	2
1240	319	college	7	1	2	4	1	3	3	3	4	2	2	1	3	3	4	3	4	2	4	4	3	4	3	2	2	3	4	3
1241	154	college	9	2	3	1	1	3	4	3	4	3	3	4	2	3	3	3	3	3	3	3	2	3	3	3	4	2	4	3
1242	343	college	7	1	2	3	3	3	3	3	3	4	2	4	4	4	4	4	4	3	4	4	4	4	2	4	4	3	3	4
1243	354	college	7	1	2	6	1	3	3	3	4	2	2	2	4	4	4	4	4	2	4	2	2	4	4	2	2	4	4	3
1244	377	college	7	2	3	3	1	4	2	3	4	5	3	4	5	4	3	4	4	2	4	1	2	4	4	2	2	4	1	4
1245	333	college	7	2	3	4	1	3	3	3	3	4	2	2	3	4	4	3	2	3	4	4	3	3	4	4	4	2	4	4
1246	435	college	8	2	4	2	2	3	1	1	3	3	4	2	3	5	3	2	3	4	3	1	4	3	5	4	5	5	4	3
1247	258	college	7	2	2	3	1	4	3	3	4	3	3	2	4	4	3	3	3	3	3	3	3	3	3	3	3	3	3	3
1248	385	college	8	1	3	3	1	3	3	2	5	2	4	2	4	3	5	4	4	2	5	4	2	4	4	1	3	4	5	5
1249	457	college	7	2	2	4	1	3	2	3	4	2	2	2	4	4	2	3	4	2	4	2	2	4	4	2	2	4	2	4
1250	488	college	7	2	2	3	1	3	3	3	4	2	1	1	4	2	2	4	3	1	4	2	1	4	5	2	2	2	4	4
1251	486	college	7	2	2	3	1	3	3	3	4	2	1	1	4	1	4	2	4	2	3	3	4	4	4	2	2	3	3	4
1252	361	college	8	2	2	5	1	3	3	3	3	4	2	1	3	4	4	3	3	2	2	4	2	4	4	2	2	2	4	3
1253	482	college	7	2	2	3	3	3	3	3	4	2	2	2	3	4	4	2	2	2	2	4	2	4	4	2	2	4	4	4
1254	703	college	8	2	2	1	1	3	4	3	4	1	1	1	4	4	2	1	5	1	5	1	1	5	5	1	1	2	1	4
1255	215	college	7	2	2	3	1	3	2	3	4	4	3	2	3	4	3	3	3	3	3	3	3	3	3	3	3	3	2	4
1256	745	college	7	1	1	2	1	3	3	3	5	1	1	1	5	1	3	5	5	1	5	1	1	5	5	1	1	5	1	5
1257	1600	college	9	2	2	3	1	3	3	4	2	4	1	2	4	4	5	2	2	5	3	4	3	2	3	4	3	2	3	4
1258	268	college	7	2	3	4	1	4	4	4	4	4	2	2	4	4	5	2	2	4	4	4	4	3	4	4	4	4	4	2
1259	478	college	7	2	3	4	1	3	2	3	4	3	3	2	3	4	4	3	4	5	4	4	3	3	3	4	3	4	3	3
1260	936	college	8	2	2	4	1	4	4	4	4	2	4	2	4	2	2	2	4	2	4	4	2	4	5	2	2	4	2	4
1261	230	college	12	1	3	3	1	3	3	3	3	3	3	5	2	5	3	3	2	5	4	3	4	2	1	3	4	2	3	3
1262	342	college	7	1	3	4	1	3	2	3	4	2	3	1	4	2	4	4	3	2	4	4	3	3	4	4	2	3	4	3
1263	561	college	12	2	2	6	3	4	2	3	4	1	4	1	5	2	4	5	5	1	4	1	3	4	5	2	3	4	4	4
1264	742	college	12	1	2	2	1	3	3	3	3	4	2	2	4	2	4	2	3	2	3	2	4	4	4	2	2	4	3	3
1265	573	college	12	1	2	3	1	3	2	2	4	2	2	2	4	3	3	3	3	4	4	3	4	3	4	2	2	3	3	3
1266	126	college	7	2	3	4	1	2	4	2	3	4	3	4	4	4	5	4	3	4	3	3	3	3	4	5	4	2	4	3
1267	811	college	12	1	2	2	1	3	2	2	4	2	3	2	4	2	4	4	4	4	4	2	2	4	4	3	2	4	3	3
1268	244	college	7	2	3	3	1	3	3	3	3	3	3	3	3	3	3	3	3	3	3	3	3	3	3	3	3	3	3	3
1269	400	college	11	1	3	2	3	3	2	2	4	2	3	2	3	4	2	4	4	2	3	2	2	4	4	2	2	4	4	3
1270	240	college	7	2	3	3	3	3	3	3	3	3	3	3	3	3	3	3	3	3	3	3	3	3	3	3	3	3	3	3
1271	91	college	7	2	5	4	1	4	5	5	5	5	5	5	5	5	5	5	5	5	5	5	5	5	5	5	5	5	5	5
1272	153	college	7	2	2	3	1	3	4	4	4	3	3	3	3	3	3	3	3	3	3	3	3	3	3	3	3	3	3	3
1273	314	college	7	2	4	3	1	3	2	3	3	4	2	3	4	4	3	4	4	3	3	2	3	3	3	4	2	3	4	4
1274	259	college	7	2	3	3	1	3	3	3	4	3	3	3	3	3	2	4	4	4	4	3	3	3	3	3	3	3	3	3
1275	730	college	7	2	3	3	1	3	2	2	3	4	3	3	3	3	4	3	3	2	4	4	4	3	3	4	3	2	4	3
1276	359	college	8	1	3	2	1	3	3	3	3	3	3	3	3	3	3	3	3	3	3	3	3	3	3	3	3	3	3	3
1277	356	college	12	2	3	5	1	3	3	3	3	3	3	3	3	3	3	3	3	3	3	3	3	3	3	3	3	3	3	3
1278	344	college	12	1	2	3	1	3	4	4	4	2	3	2	4	2	2	3	4	4	4	2	2	4	4	4	2	2	2	3
1279	406	college	7	2	3	3	1	3	4	4	4	2	2	2	4	4	5	4	3	4	4	3	2	4	4	4	3	3	4	4
1280	291	college	12	1	2	3	1	4	2	2	4	4	2	2	4	4	5	4	4	5	2	4	5	2	5	4	3	2	5	4
1281	324	college	12	1	2	3	1	3	2	3	4	1	2	2	4	4	4	4	2	2	3	4	3	4	4	4	4	4	4	4
1282	274	college	12	1	1	3	3	4	3	3	3	1	3	1	4	2	1	4	4	3	4	2	2	3	4	2	2	4	2	3
1283	466	college	8	1	4	4	1	4	2	2	2	4	4	4	4	4	4	4	4	4	4	4	4	4	4	4	4	4	4	4
1284	576	college	12	1	4	3	1	4	3	3	2	4	2	2	3	4	4	3	3	3	3	2	1	3	1	3	2	4	3	3
1285	471	college	12	1	3	2	1	4	3	3	4	3	2	2	4	3	3	3	4	4	4	4	4	4	4	4	2	4	3	3
1286	224	college	12	1	3	2	1	3	3	3	3	3	3	3	4	4	3	3	3	3	3	3	3	3	3	3	3	3	3	3
1287	256	college	12	1	4	4	3	3	3	3	2	4	2	4	2	5	3	2	2	2	4	2	4	2	2	4	4	2	2	3
1288	298	college	12	1	3	3	3	4	3	4	4	2	4	3	4	4	4	3	3	4	4	4	3	4	3	3	2	4	3	3
1289	378	college	12	1	2	4	1	3	3	3	4	2	3	2	4	3	2	2	4	4	4	4	2	4	4	2	2	4	2	3
1290	131	college	12	1	3	2	1	3	3	3	3	3	3	2	3	4	2	4	3	2	3	3	3	3	3	3	4	4	4	4
1291	187	college	12	2	2	4	3	3	3	3	2	3	3	2	3	3	3	3	4	3	4	3	4	3	2	3	4	4	4	5
1292	242	college	12	1	4	4	1	3	3	4	4	4	4	2	4	4	4	3	2	3	3	3	2	4	2	4	2	4	2	4
1293	179	college	12	1	4	3	1	3	5	5	4	4	4	4	4	4	4	4	4	4	4	4	4	4	4	4	4	4	4	4
1294	98	college	12	2	3	1	1	3	3	3	3	2	3	3	2	3	3	2	3	3	2	3	3	3	2	3	4	3	3	2
1295	194	college	12	1	1	4	1	3	5	4	3	3	3	3	3	3	3	3	3	3	3	3	3	3	3	3	3	3	3	3
1296	1592	college	12	1	2	3	1	3	2	2	3	3	3	3	4	2	3	3	4	3	4	2	2	4	4	2	2	4	2	4
1297	1140	college	12	1	3	3	1	3	3	3	4	2	4	2	4	2	2	4	4	4	4	4	3	3	4	2	2	4	3	4
